# Supplementary material for: Genome-Wide Identification and Functional Analysis of NADPH Oxidase Family Genes in Wheat During Development and Environmental Stress Responses
Source: PubMed Central journal article supplement (PMC6065054; doi:10.3389/fpls.2018.00906), 2018-07-23
Supplement: Presentation_1.pdf [file Presentation_1.pdf]

---

*Supplementary Material*

**Genome-wide identification and functional analysis of NADPH oxidase family genes in wheat during development and environmental stress responses**

Chun-Hong Hu<sup>1,2†</sup>, Xiao-Yong Wei<sup>1†</sup>, Bo Yuan<sup>1</sup>, Lin-Bo Yao<sup>1</sup>, Tian-Tian Ma<sup>1</sup>, Peng-Peng Zhang<sup>1</sup>, Xiang Wang<sup>1</sup>, Peng-Qi Wang<sup>1</sup>, Wen-Ting Liu<sup>1</sup>, Wen-Qiang Li<sup>1</sup>, Lai-Sheng Meng<sup>3</sup>, Kun-Ming Chen<sup>1\*</sup>

<sup>1</sup>, State Key Laboratory of Crop Stress Biology in Arid Areas, College of Life Sciences, Northwest A&F University, Yangling 712100, Shaanxi, P. R. China.

<sup>2</sup>, Department of general biology, College of Life Science and Agronomy, Zhoukou Normal University, Zhoukou 466000, Henan, P. R. China.

<sup>3</sup>, The Key Laboratory of Biotechnology for Medicinal Plant of Jiangsu Province, School of Life Sciences, Jiangsu Normal University, Xuzhou 221116, Jiangsu, P. R. China.

†, These authors contributed equally to this work.

\*Correspondence author: Kunming Chen

State Key Laboratory of Crop Stress Biology in Arid Area/College of Life Sciences, Northwest A&F University, Yangling, Shaanxi, 712100, China.

Tel.: +86-29-8708-1178; Fax: +86-29-8709-2262.

Email: kunmingchen@nwsuaf.edu.cn; kunmingchen@163.com

E-mail addresses of authors: Chun-Hong Hu, ourcarrot@163.com; Xiao-Yong Wei, weixiaoyongshengwu@163.com; Bo Yuan, jax911911@gmail.com; Lin-Bo Yao, 675053332@qq.com; Tian-Tian Ma, 9447w@sina.com; Peng-Peng Zhang, 15256849763@163.com; Xiang Wang, wangxiang1342@126.com; Peng-Qi Wang, wangpengqi@nwafu.edu.cn; Wen-Ting Liu, lwt1635@yahoo.com; Wen-Qiang Li, wqli@nwsuaf.edu.cn; Lai-Sheng Meng, menglsh@jsnu.edu.cn; Kun-Ming Chen, kunmingchen@nwsuaf.edu.cn

## 1. Supplementary Figures and Tables

## 1.1 Supplementary Figures

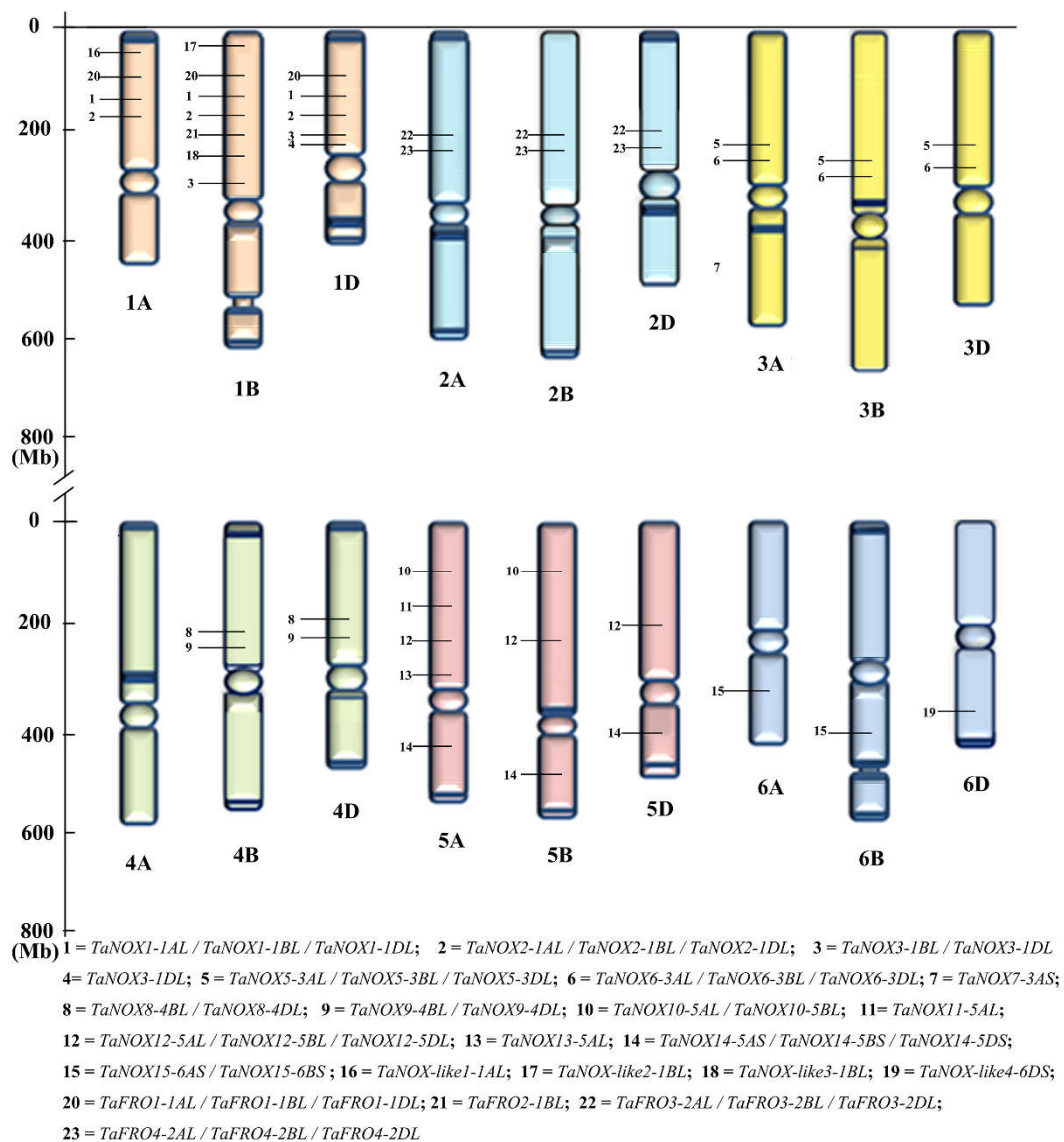

**Figure S1.** Chromosomal locations of wheat *TaNOXs*. The graph was drawn by Adobe\_Photoshop\_CS6 according to the information from scaffolds and Gene ID of each wheat NOX genes and the original sketches were gotten from the WHEAT URGI website (<https://wheat-urgi.versailles.inra.fr/Seq-Repository>). *TaNOXs* positions are indicated by short horizontal lines and numbers.

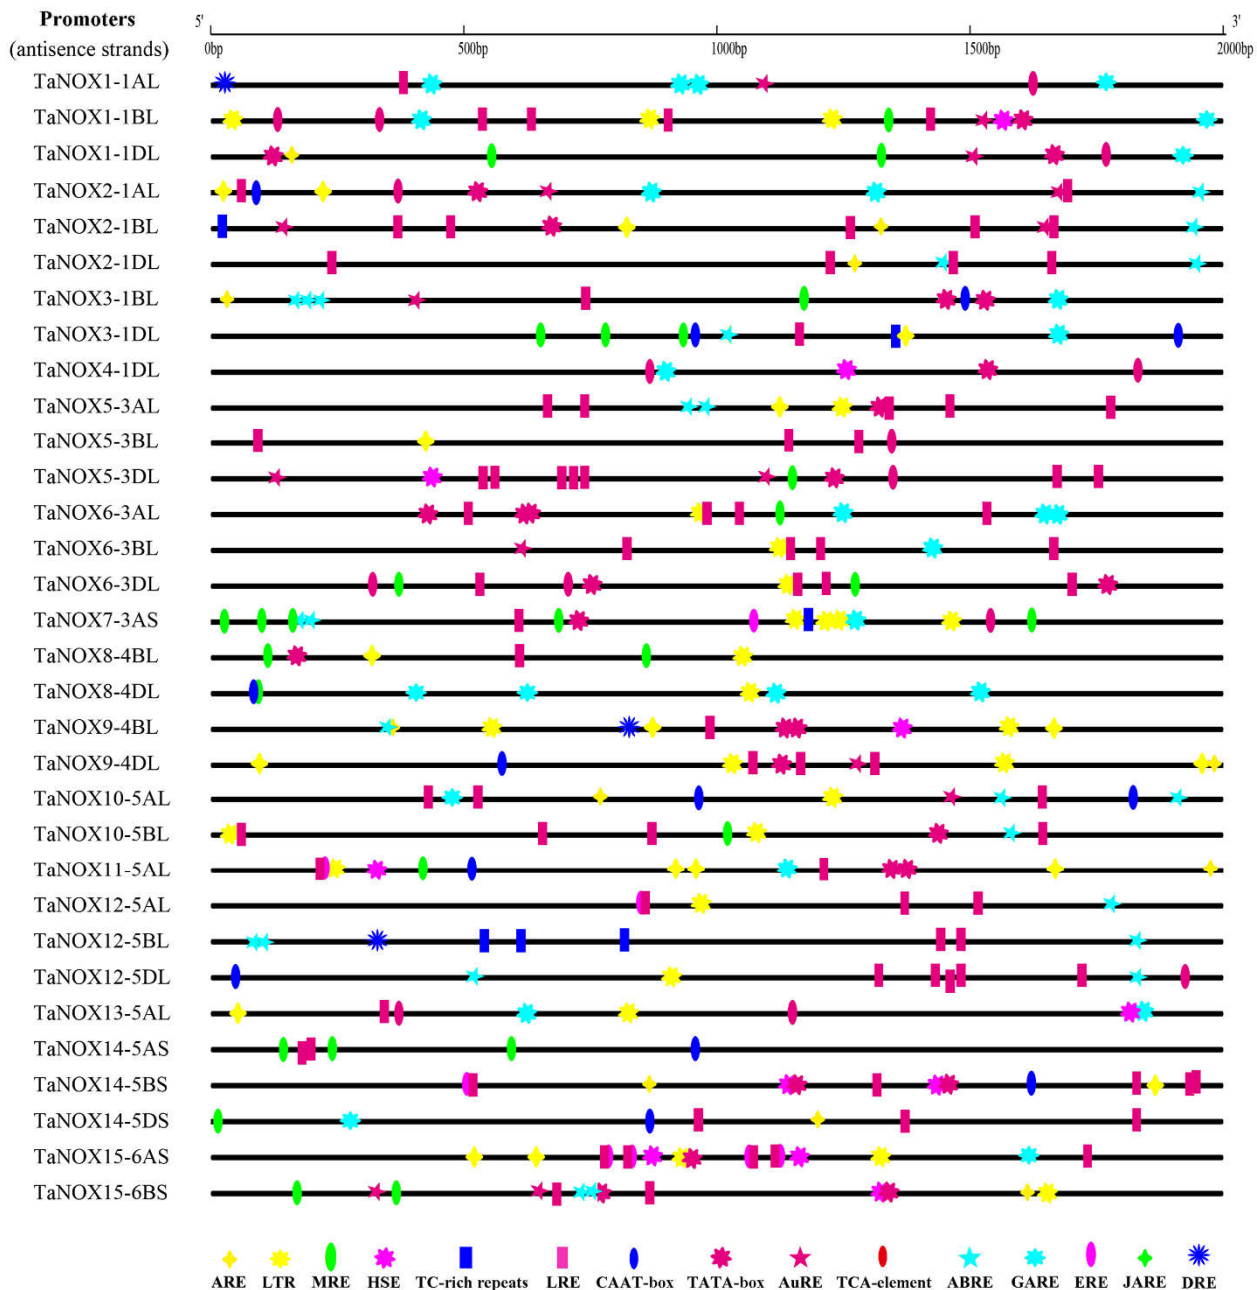

**Figure S2.** The cis-elements responding to abiotic-/biotic-stresses and hormone treatments in the antisense strands of the TaNOX promoters. The cis-elements are as follows. Anaerobic responsive element (ARE): ARE and GC-motif; LTR: low-temperature responsiveness; MYB responsive element (MRE): MBS and MRE; HSE: heat stress responsiveness; TC-rich repeats: defense and stress responsiveness; Light responsive element (LRE): G-box, SPI, MNF1,4cl-CMA2b,GT1-motif, ACE, AAC-motif, 3AF1-binding site and BoxI elements; CAAT-box: common cis-acting element in promoter and enhancer regions; TATA-box: core promoter element around -30 of transcription start; Auxin-responsive element (AuRE): AuXRR-core and TGA-element; TCA-element: salicylic acid (SA) responsiveness; Abscisic acid responsive element (ABRE): ABRE, motif IIb and CE3 elements; Gibberellins (GA)-responsive element (GARE): GARE, TATC-box and p-box; ERE: ethylene-responsive element; Methyl jasmonic acid (MeJA) responsive element (JARE): TGACG-motif and CGTCA-motif.

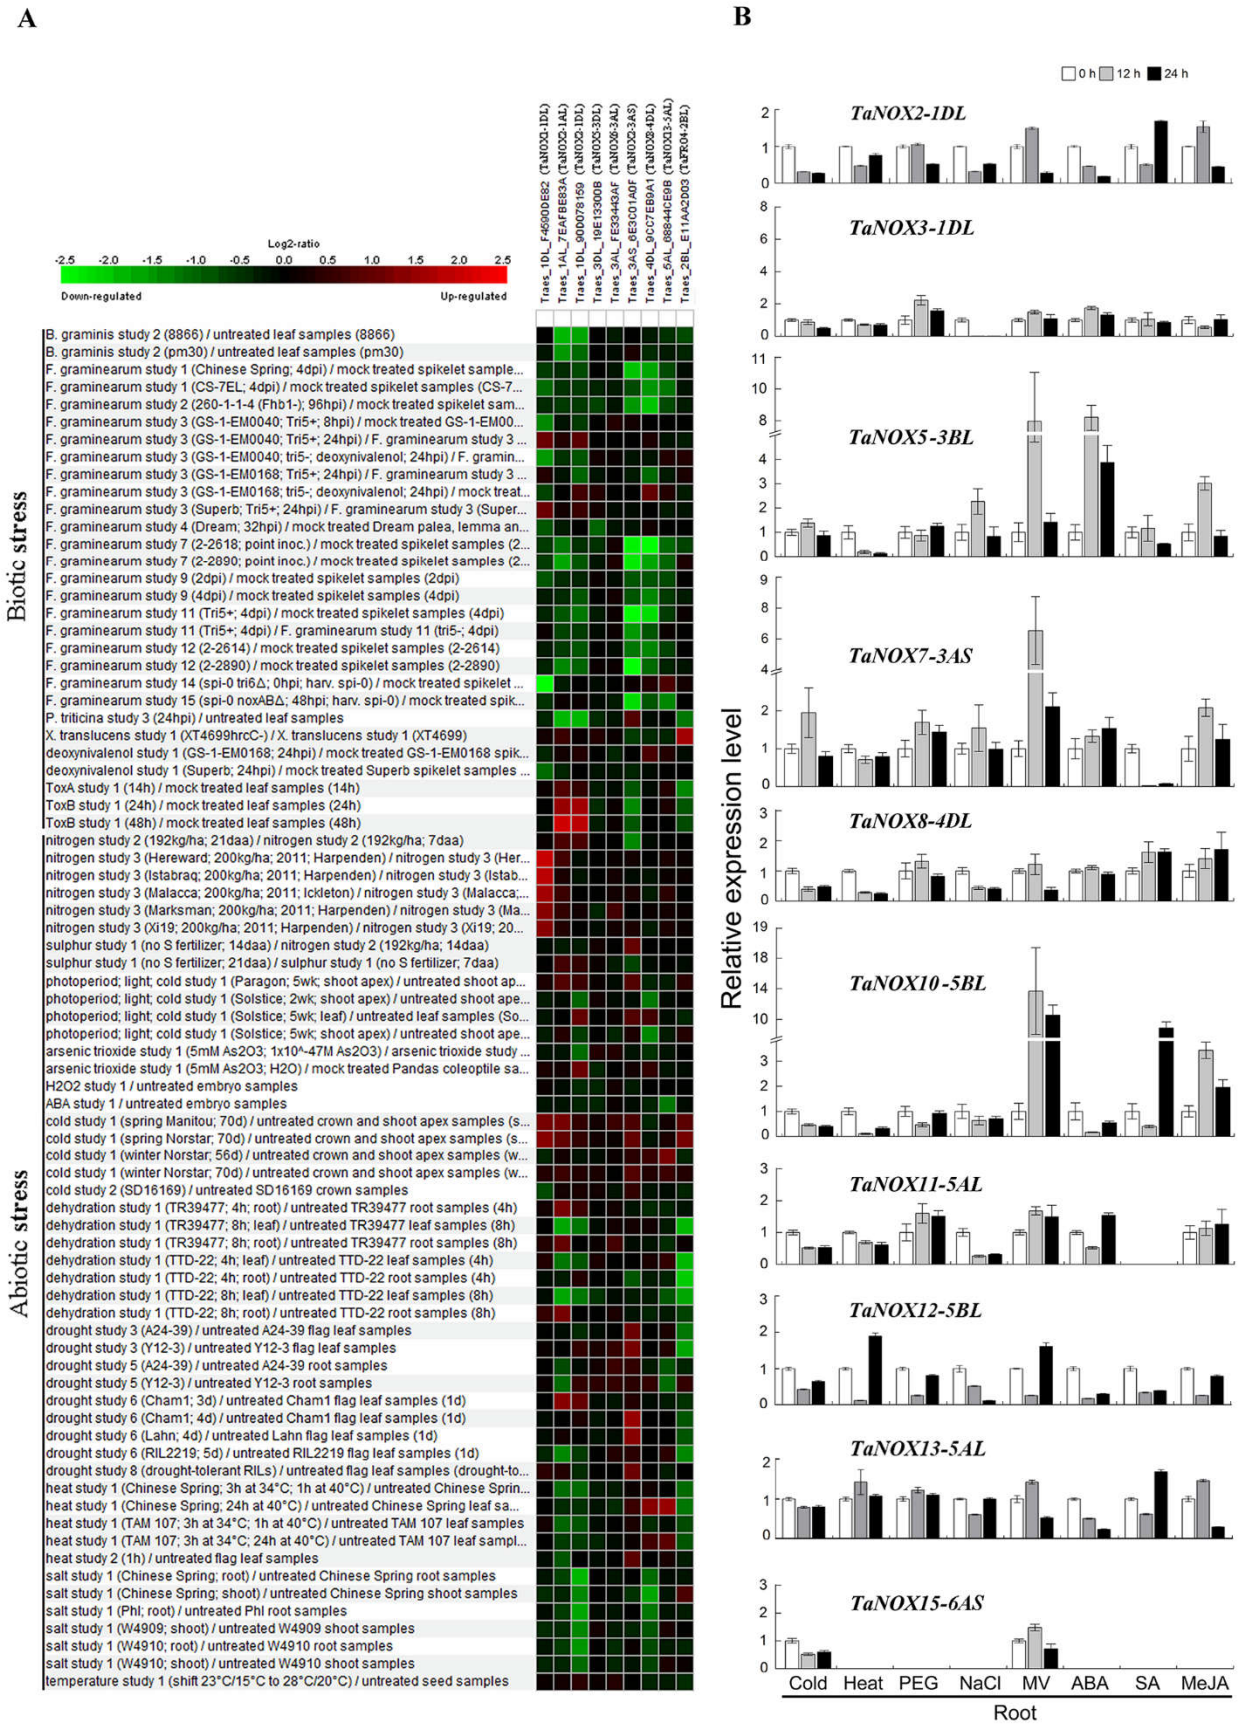

**Figure S3.** Inducible patterns of TaNOXs under different biotic and abiotic stresses. (A) The expression profiles obtained from the database of TA\_AFFY\_WHEAT-0 as reported by Genevestigator v3, illustrating different expression levels of TaNOXs under different biotic and abiotic stresses. Results were given as heat



maps in green/red coding that reflect relative signal values; where greener represents stronger down-regulated expression and redder represents stronger up-regulated expression. (B) The inducible expression patterns of wheat NOX family genes in roots under abiotic stresses and hormone treatments. Expression levels of the TaNOXs were assayed by qRT-PCR under cold (4°C), heat (40°C), 20% PEG6000, salt (200 mM NaCl), and oxidative (30  $\mu$ M MV) stresses and by ABA (100  $\mu$ M), SA (500  $\mu$ M), MeJA (100  $\mu$ M) hormone treatments. Two-week old seedlings were used for the analysis. Data are means  $\pm$  SD (n = 3) and are representative of similar results from three independent experiments with three or four replicates for each experiment.

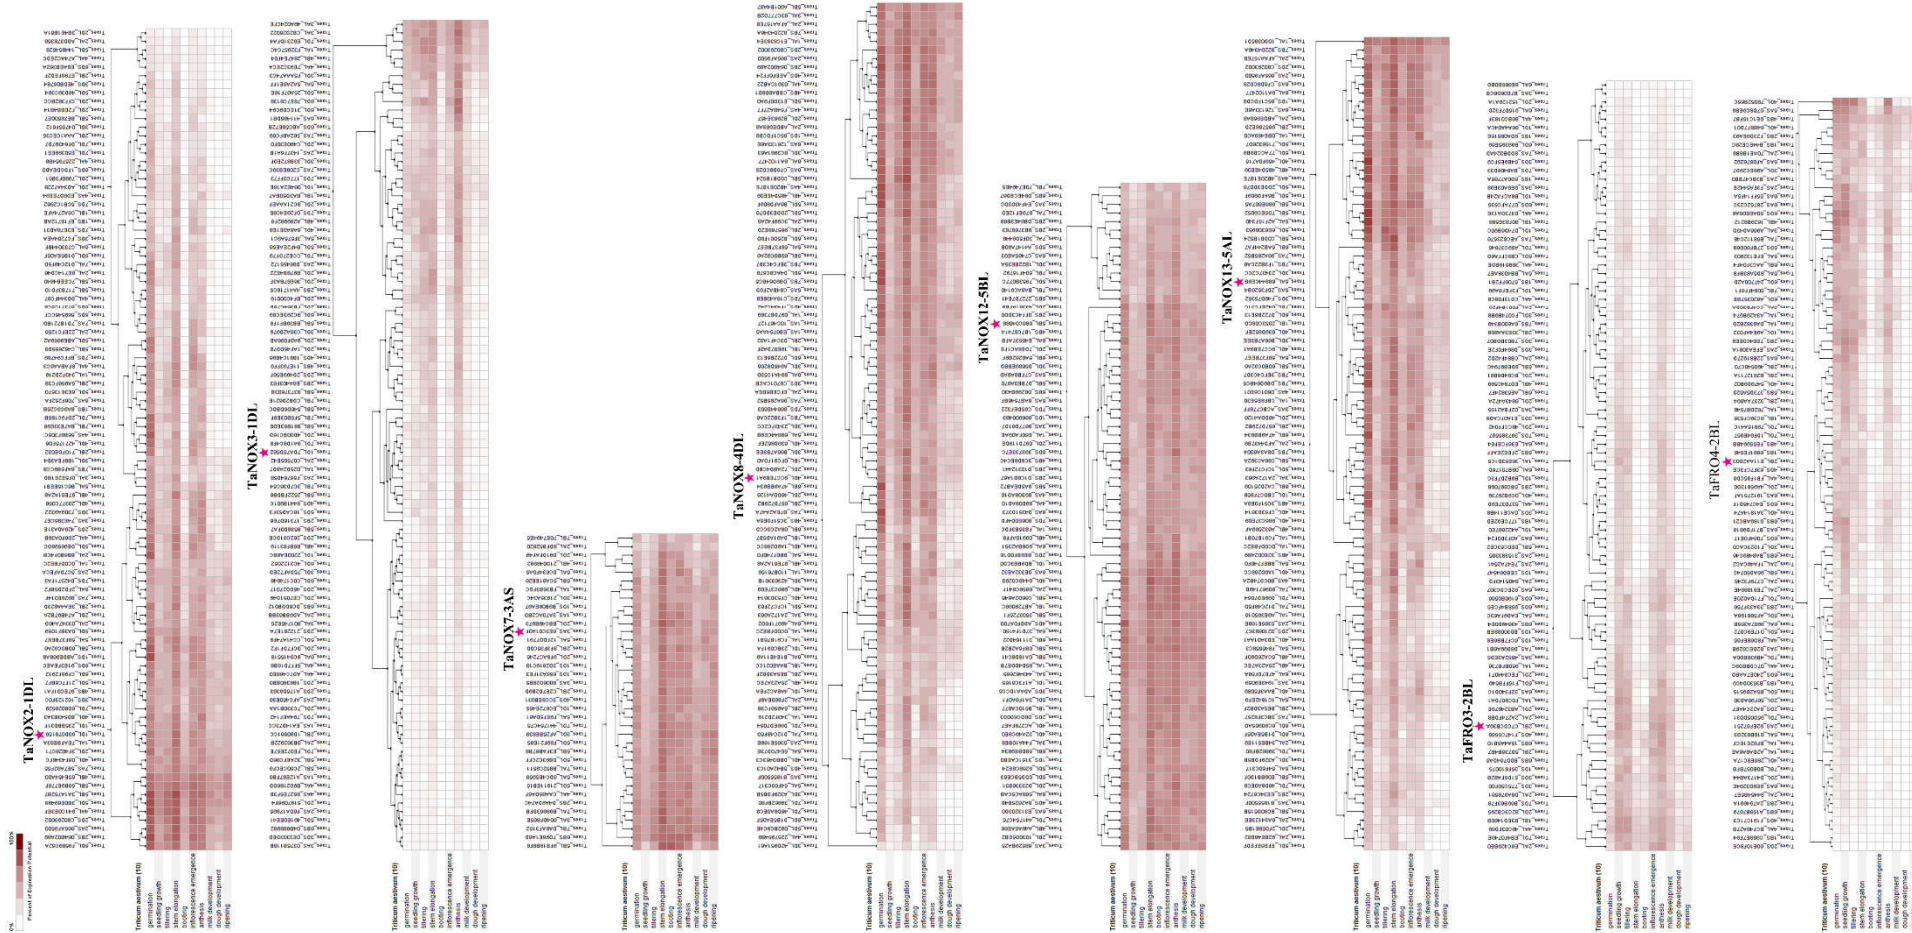

**Figure S4.** The coexpression patterns between wheat *TaNOX* genes and others at ten different developmental stages. The coexpression relationship between eight wheat *TaNOXs* and other genes were inferred from the database of *Ta\_mRNASeq\_WHEAT\_GL-0* with Geneinvestigator v3. The eight *TaNOX* genes including *TaNOX2-1DL*, *TaNOX3-1DL*, *TaNOX7-3AS*, *TaNOX8-4DL*, *TaNOX12-5BL*, *TaNOX13-5AL*, *TaFRO3-2BL* and *TaFRO4-2BL*, were selected for the analysis. The ten developmental stages include germination, sheeding growth, tillering, stem elongation, booting, inflorescence emergence, anthesis, milk development, dough development and ripening. ★ : Represents the target gene among the eight *TaNOXs*.

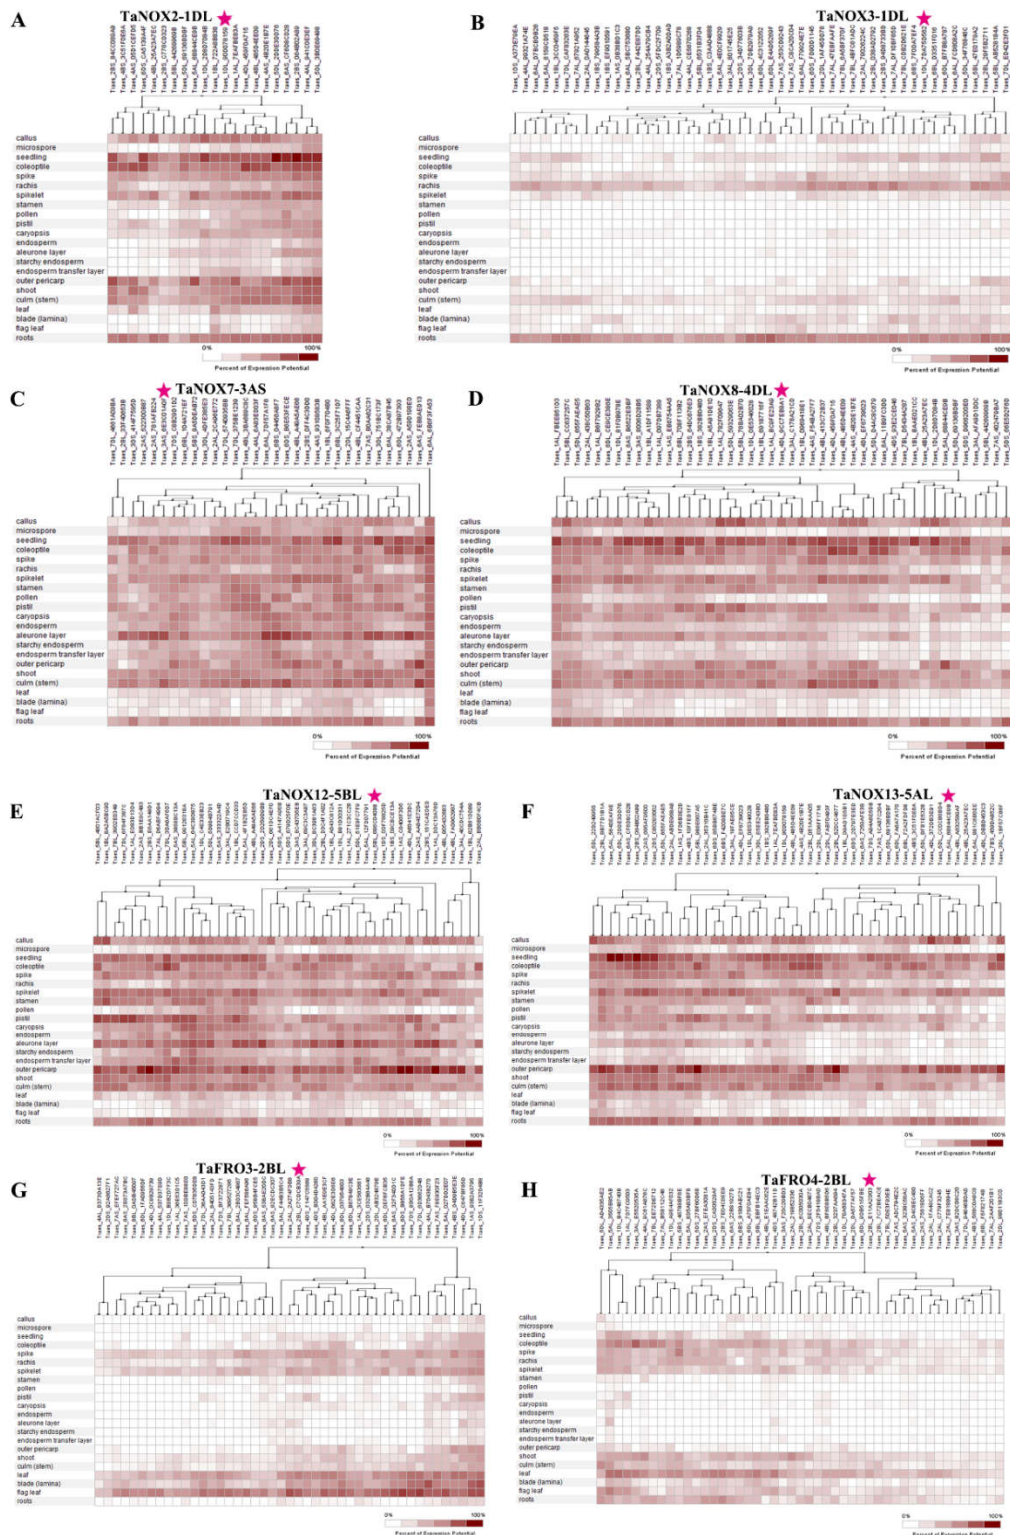

**Figure S5. The coexpression patterns between wheat *TaNOX* genes and others in twenty two different tissues of wheat.** The coexpression relationship between eight *TaNOX*s and other genes were inferred from the database of Ta\_mRNASeq\_WHEAT\_GL-0 with Geneinvestigator v3. The eight *TaNOX* genes are the same to those in figure S4. The twenty two tissues include callus, microspore, coleoptile, spike, rachis, spikelet, stamen, pollen, pistil, caryopsis, endosperm, aleurone layer, ltrarchy endosperm, endosperm transfer layer, outer pericarp, shoot, culm(stem), leaf, blade(lamina), flag leaf, roots. ★ : Represents the target gene among the eight *TaNOX*s.



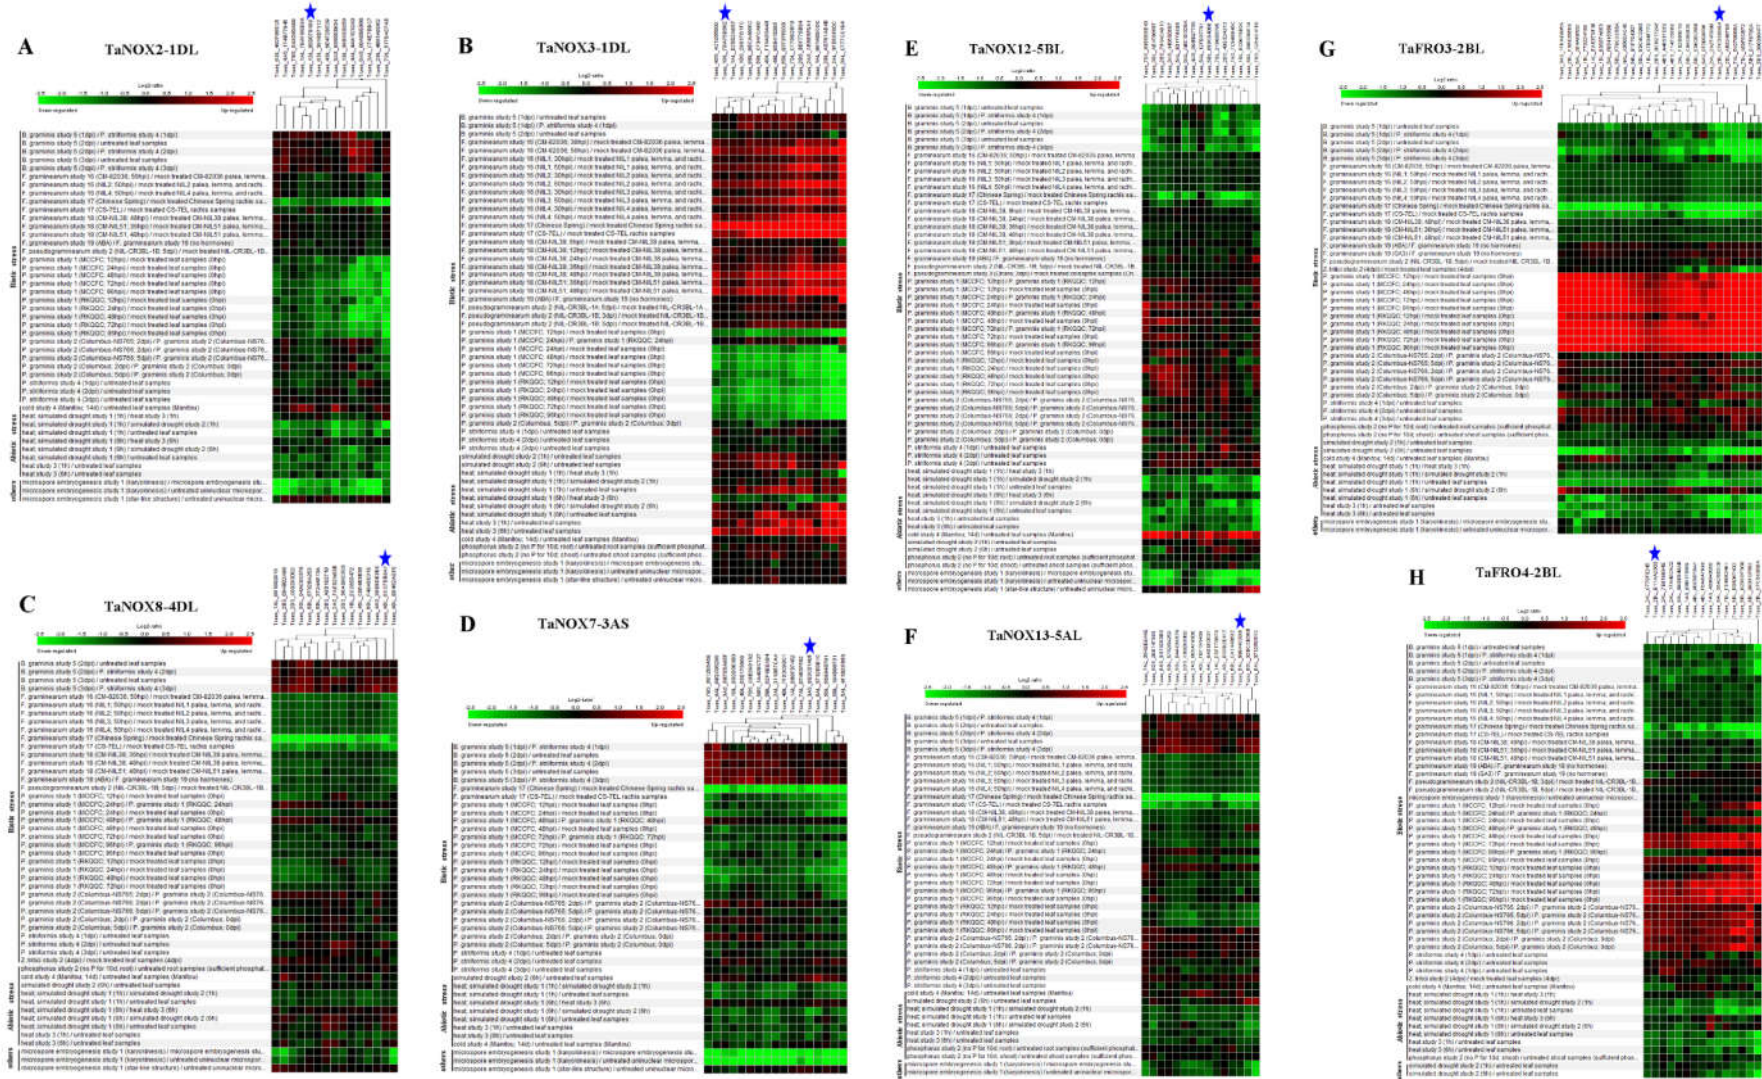

**Figure S6. The coexpression relationship between wheat *TaNOX* genes and others under biotic and abiotic stresses.** The response profiles between eight *TaNOX*s and other genes in wheat were inferred from the database of Ta\_mRNASeq WHEAT GL-0 with Genevestigator v3. The eight *TaNOX* genes are the same to those in figure S4. ★: Represents the target gene of the *TaNOX*s.



## 1.2 Supplementary Tables

Table S1. The detailed information about the members of wheat *NOXs* gene family

| Nomenclature of wheat <i>NOX</i> |                    |                    | Genomic Location                         | Gene ID                                          | Chr | Loc  | TMH | A.A. | MW/Da     | pI   | Different Number of A.A. |     |     |
|----------------------------------|--------------------|--------------------|------------------------------------------|--------------------------------------------------|-----|------|-----|------|-----------|------|--------------------------|-----|-----|
|                                  |                    |                    |                                          |                                                  |     |      |     |      |           |      | A-B                      | B-D | A-D |
| <i>TaNOXs</i>                    | <i>TaNOX1</i>      | <i>TaNOX1-1AL</i>  | TGACv1_scaffold_002060_1AL:21147-25845   | TRIAE_CS42_1AL_TGACv1_002060_AA0038250.1         | 1A  | Plas | 4   | 832  | 94214.27  | 8.92 |                          |     |     |
|                                  |                    | <i>TaNOX1-1BL</i>  | TGACv1_scaffold_030848_1BL:25006-29614   | TRIAE_CS42_1BL_TGACv1_030848_AA0102150.1         | 1B  | Plas | 4   | 890  | 100557.77 | 9.16 | 74                       | 20  | 69  |
|                                  |                    | <i>TaNOX1-1DL</i>  | TGACv1_scaffold_061459_1DL:54937-59575   | TRIAE_CS42_1DL_TGACv1_061459_AA0195890.1         | 1D  | Plas | 4   | 888  | 100477.76 | 9.22 |                          |     |     |
| <i>TaNOX2</i>                    | <i>TaNOX2-1AL</i>  | <i>TaNOX2-1AL</i>  | TGACv1_scaffold_002261_1AL:13467-22435   | TRIAE_CS42_1AL_TGACv1_002261_AA0040140.2         | 1A  | Plas | 4   | 972  | 109103.56 | 9.42 |                          |     |     |
|                                  |                    | <i>TaNOX2-1BL</i>  | TGACv1_scaffold_031365_1BL:95301-103840  | TRIAE_CS42_1BL_TGACv1_031365_AA0112470.1         | 1B  | Plas | 6   | 972  | 108913.98 | 9.23 | 68                       | 22  | 67  |
|                                  |                    | <i>TaNOX2-1DL</i>  | TGACv1_scaffold_062127_1DL:37147-45975   | TRIAE_CS42_1DL_TGACv1_062127_AA0209090.2         | 1D  | Plas | 4   | 968  | 108569.55 | 9.23 |                          |     |     |
| <i>TaNOX3</i>                    | <i>TaNOX3-1BL</i>  | <i>TaNOX3-1BL</i>  | TGACv1_scaffold_034166_1BL:14946-24528   | TRIAE_CS42_1BL_TGACv1_034166_AA0143700.2         | 1B  | Plas | 4   | 1145 | 130412.86 | 8.87 |                          |     |     |
|                                  |                    | <i>TaNOX3-1DL</i>  | TGACv1_scaffold_061195_1DL:74304-85785   | TRIAE_CS42_1DL_TGACv1_061195_AA0188450.1         | 1D  | Plas | 4   | 1160 | 131928.72 | 8.88 |                          |     | 137 |
| <i>TaNOX4</i>                    | <i>TaNOX4-1DL</i>  | <i>TaNOX4-1DL</i>  | TGACv1_scaffold_061195_1DL:100775-108485 | TRIAE_CS42_1DL_TGACv1_061195_AA0188480.1         | 1D  | Plas | 6   | 999  | 110812.52 | 9.18 |                          |     |     |
| <i>TaNOX5</i>                    | <i>TaNOX5-3AL</i>  | <i>TaNOX5-3AL</i>  | TGACv1_scaffold_195088_3AL:18969-23946   | TRIAE_CS42_3AL_TGACv1_195088_AA0644550.1         | 3A  | Plas | 4   | 851  | 95748.79  | 9.44 |                          |     |     |
|                                  |                    | <i>TaNOX5-3BL</i>  | TGACv1_scaffold_225180_3B:6031-11525     | TRIAE_CS42_3B_TGACv1_225180_AA0805890.2          | 3B  | Plas | 4   | 850  | 95660.72  | 9.47 | 9                        | 12  | 10  |
|                                  |                    | <i>TaNOX5-3DL</i>  | TGACv1_scaffold_249608_3DL:46197-51065   | TRIAE_CS42_3DL_TGACv1_249608_AA0852330.2         | 3D  | Plas | 4   | 847  | 95315.30  | 9.45 |                          |     |     |
| <i>TaNOX6</i>                    | <i>TaNOX6-3AL</i>  | <i>TaNOX6-3AL</i>  | TGACv1_scaffold_195736_3AL:18346-27475   | TRIAE_CS42_3AL_TGACv1_195736_AA0653240.3         | 3A  | Plas | 4   | 976  | 109814.33 | 9.42 |                          |     |     |
|                                  |                    | <i>TaNOX6-3BL</i>  | TGACv1_scaffold_221373_3B:62111-69519    | TRIAE_CS42_3B_TGACv1_221373_AA0738650.2          | 3B  | Plas | 4   | 944  | 106663.66 | 9.26 | 49                       | 11  | 43  |
|                                  |                    | <i>TaNOX6-3DL</i>  | TGACv1_scaffold_251733_3DL:24311-31685   | TRIAE_CS42_3DL_TGACv1_251733_AA0884390.2         | 3D  | Plas | 6   | 946  | 106852.90 | 9.28 |                          |     |     |
| <i>TaNOX7</i>                    | <i>TaNOX7-3AS</i>  | <i>TaNOX7-3AS</i>  | TGACv1_scaffold_211536_3AS:54051-73959   | TRIAE_CS42_3AS_TGACv1_211536_AA0691290.1         | 3A  | Plas | 4   | 901  | 101630.76 | 9.35 |                          |     |     |
| <i>TaNOX8</i>                    | <i>TaNOX8-4BL</i>  | <i>TaNOX8-4BL</i>  | TGACv1_scaffold_320896_4BL:55358-63622   | TRIAE_CS42_4BL_TGACv1_320896_AA1051070.2         | 4B  | Plas | 6   | 847  | 95330.74  | 9.19 |                          |     |     |
|                                  |                    | <i>TaNOX8-4DL</i>  | TGACv1_scaffold_343050_4DL:40633-46817   | TRIAE_CS42_4DL_TGACv1_343050_AA1128500.1         | 4D  | Plas | 6   | 841  | 94791.09  | 9.21 |                          |     | 14  |
| <i>TaNOX9</i>                    | <i>TaNOX9-4BL</i>  | <i>TaNOX9-4BL</i>  | TGACv1_scaffold_321503_4BL:27846-36005   | TRIAE_CS42_4BL_TGACv1_321503_AA1061470.3         | 4B  | Plas | 4   | 920  | 103696.93 | 9.34 |                          |     |     |
|                                  |                    | <i>TaNOX9-4DL</i>  | TGACv1_scaffold_343029_4DL:55967-62975   | TRIAE_CS42_4DL_TGACv1_343029_AA1127810.3         | 4D  | Plas | 4   | 921  | 103724.99 | 9.37 |                          |     | 10  |
| <i>TaNOX10</i>                   | <i>TaNOX10-5AL</i> | <i>TaNOX10-5AL</i> | TGACv1_scaffold_374312_5AL:121236-124735 | TRIAE_CS42_5AL_TGACv1_374312_AA1196640.2         | 5A  | Plas | 4   | 831  | 93520.63  | 9.50 |                          |     |     |
|                                  |                    | <i>TaNOX10-5BL</i> | TGACv1_scaffold_404354_5BL:132580-133920 | BankIt2018780 Seq1MF166871(providedby gene bank) | 5B  | Plas | 4   | 918  | 102796.57 | 9.24 |                          |     | 101 |
| <i>TaNOX11</i>                   | <i>TaNOX11-5AL</i> | <i>TaNOX11-5AL</i> | TGACv1_scaffold_375026_5AL:12006-19009   | TRIAE_CS42_5AL_TGACv1_375026_AA1214240.1         | 5A  | Plas | 4   | 919  | 103462.43 | 9.28 |                          |     |     |
|                                  | <i>TaNOX12-5AL</i> | <i>TaNOX12-5AL</i> | TGACv1_scaffold_376348_5AL:15676-34722   | TRIAE_CS42_5AL_TGACv1_376348_AA1235550.1         | 5A  | Plas | 4   | 989  | 110951.73 | 9.23 |                          |     |     |

**Table S1. Continued**

| Nomenclature of wheat NOX | Genomic Location   | Gene ID                                  | Chr                                      | Loc                                      | TMH  | A.A. | MW/Da | pI        | Different Number of A.A. |      |     |    |    |
|---------------------------|--------------------|------------------------------------------|------------------------------------------|------------------------------------------|------|------|-------|-----------|--------------------------|------|-----|----|----|
|                           |                    |                                          |                                          |                                          |      |      |       |           | A-B                      | B-D  | A-D |    |    |
| <i>TaNOXs</i>             | TaNOX12-5BL        | TGACv1_scaffold_406190_5BL:21326-32065   | TRIAE_CS42_5BL_TGACv1_406190_AA1342020.1 | 5B                                       | Plas | 4    | 985   | 110737.51 | 9.19                     |      |     |    |    |
|                           | TaNOX12-5DL        | TGACv1_scaffold_433213_5DL:35340-45258   | TRIAE_CS42_5DL_TGACv1_433213_AA1405680.1 | 5D                                       | Plas | 4    | 994   | 111265.9  | 9.19                     |      |     |    |    |
| <i>TaNOX13</i>            | TaNOX13-5AL        | TGACv1_scaffold_377290_5AL:27991-34187   | TRIAE_CS42_5AL_TGACv1_377290_AA1245640.1 | 5A                                       | Plas | 6    | 847   | 95219.60  | 9.18                     |      |     |    |    |
| <i>TaNOX14</i>            | <i>TaNOX14-5AS</i> | TGACv1_scaffold_393979_5AS:10356-14798   | TRIAE_CS42_5AS_TGACv1_393979_AA1277500.2 | 5A                                       | Plas | 4    | 877   | 98755.13  | 9.10                     |      |     |    |    |
|                           | <i>TaNOX14-5BS</i> | TGACv1_scaffold_424084_5BS:25677-29885   | TRIAE_CS42_5BS_TGACv1_424084_AA1386730.1 | 5B                                       | Plas | 4    | 873   | 98179.39  | 9.16                     | 36   | 25  | 31 |    |
| <i>TaNOX15</i>            | <i>TaNOX14-5DS</i> | TGACv1_scaffold_458299_5DS:17176-21163   | TRIAE_CS42_5DS_TGACv1_458299_AA1493220.1 | 5D                                       | Plas | 4    | 865   | 97360.53  | 9.11                     |      |     |    |    |
|                           | <i>TaNOX15-6AS</i> | TGACv1_scaffold_641235_U:99086-105234    | TRIAE_CS42_U_TGACv1_641235_AA2089190.1   | 6A                                       | Plas | 4    | 956   | 106597.02 | 9.26                     |      |     |    |    |
|                           | <i>TaNOX15-6BS</i> | TGACv1_scaffold_513624_6BS:121044-129225 | TRIAE_CS42_6BS_TGACv1_513624_AA1646010.1 | 6B                                       | Plas | 4    | 957   | 106848.12 | 9.04                     |      | 28  |    |    |
| <i>TaNOX-likes</i>        | <i>TaNOX-like1</i> | <i>TaNOX-like1-1AL</i>                   | TGACv1_scaffold_001598_1AL:24546-36314   | TRIAE_CS42_1AL_TGACv1_001598_AA0032710.1 | 1A   | Plas | 0     | 651       | 73338.61                 | 6.11 |     |    |    |
|                           | <i>TaNOX-like2</i> | <i>TaNOX-like2-1BL</i>                   | TGACv1_scaffold_030295_1BL:132356-145070 | TRIAE_CS42_1BL_TGACv1_030295_AA0085740.1 | 1B   | Plas | 5     | 675       | 76654.61                 | 9.41 |     |    |    |
|                           | <i>TaNOX-like3</i> | <i>TaNOX-like3-1BL</i>                   | TGACv1_scaffold_032482_1BL:22766-37498   | TRIAE_CS42_1BL_TGACv1_032482_AA0130380.1 | 1B   | Plas | 0     | 602       | 67747.99                 | 6.02 |     |    |    |
|                           | <i>TaNOX-like4</i> | <i>TaNOX-like4-6DS</i>                   | TGACv1_scaffold_542557_6DS:1-2175        | TRIAE_CS42_6DS_TGACv1_542557_AA1724240.1 | 6D   | Plas | 0     | 506       | 55792.32                 | 8.50 |     |    |    |
| <i>TaFROs</i>             | <i>TaFRO1</i>      | <i>TaFRO1-1AL</i>                        | TGACv1_scaffold_003503_1AL:5146-11302    | TRIAE_CS42_1AL_TGACv1_003503_AA0050090.1 | 1A   | Plas | 6     | 792       | 88760.15                 | 8.52 |     |    |    |
|                           |                    | <i>TaFRO1-1BL</i>                        | TGACv1_scaffold_030604_1BL:113286-118880 | TRIAE_CS42_1BL_TGACv1_030604_AA0095460.1 | 1B   | Plas | 6     | 822       | 92043.96                 | 8.34 | 74  | 24 | 70 |
|                           |                    | <i>TaFRO1-1DL</i>                        | TGACv1_scaffold_061711_1DL:15506-23338   | TRIAE_CS42_1DL_TGACv1_061711_AA0202110.1 | 1D   | Plas | 6     | 823       | 91985.01                 | 8.49 |     |    |    |
|                           | <i>TaFRO2</i>      | <i>TaFRO2-1BL</i>                        | TGACv1_scaffold_031571_1BL:51686-62773   | TRIAE_CS42_1BL_TGACv1_031571_AA0116350.2 | 1B   | Plas | 5     | 670       | 76888.19                 | 9.44 |     |    |    |
|                           | <i>TaFRO3</i>      | <i>TaFRO3-2AL</i>                        | TGACv1_scaffold_093270_2AL:96022-100945  | TRIAE_CS42_2AL_TGACv1_093270_AA0276290.1 | 2A   | Plas | 11    | 748       | 82260.86                 | 8.57 |     |    |    |
|                           |                    | <i>TaFRO3-2BL</i>                        | TGACv1_scaffold_130340_2BL:64246-69130   | TRIAE_CS42_2BL_TGACv1_130340_AA0409100.1 | 2B   | Plas | 11    | 806       | 88741.40                 | 9.21 | 74  | 88 | 26 |
|                           |                    | <i>TaFRO3-2DL</i>                        | TGACv1_scaffold_159911_2DL:34457-39345   | TRIAE_CS42_2DL_TGACv1_159911_AA0544270.1 | 2D   | Plas | 11    | 747       | 82323.05                 | 8.54 |     |    |    |
|                           | <i>TaFRO4</i>      | <i>TaFRO4-2AL</i>                        | TGACv1_scaffold_093999_2AL:25654-28885   | TRIAE_CS42_2AL_TGACv1_093999_AA0290910.1 | 2A   | Plas | 8     | 776       | 84824.23                 | 9.53 |     |    |    |
| <i>TaFRO4-2BL</i>         |                    | TGACv1_scaffold_129792_2BL:24851-27935   | TRIAE_CS42_2BL_TGACv1_129792_AA0396070.1 | 2B                                       | Plas | 8    | 723   | 79348.82  | 9.63                     | 94   | 43  | 84 |    |
|                           | <i>TaFRO4-2DL</i>  | TGACv1_scaffold_160193_2DL:15929-19285   | TRIAE_CS42_2DL_TGACv1_160193_AA0547970.1 | 2D                                       | Plas | 8    | 722   | 79038.66  | 9.59                     |      |     |    |    |

The data source of wheat from IWGSC (<http://www.wheatgenome.org/>), e!EnsemblPlants (<http://plants.ensembl.org/index.html>), ExPASy (<http://web.expasy.org/protparam/>), Plant-mPLoc (<http://www.csbio.sjtu.edu.cn/bioinf/plant-multi/>) and TMHMM v.2.0 (<http://www.cbs.dtu.dk/services/TMHMM/>). A.A.: number of amino acids; MW: molecular weight; pI: theoretical isoelectric point; Chr.: chromosome; Loc: the subcellular localization; TMH: the numbers of transmembrane helix.

**Table S2. NOXs and FROs gene family members in eight plant species**

| Lineages       | Species                  | Nomenclature<br><i>NOX</i> and <i>FRO</i> | Gene ID                                           | A.A.                         |
|----------------|--------------------------|-------------------------------------------|---------------------------------------------------|------------------------------|
| Monocots       | <i>Triticum aestivum</i> | <i>TaNOX1-1BL</i>                         | TRIAE_CS42_1BL_TGACv1_030848_AA0102150.1          | 890                          |
|                |                          | <i>TaNOX2-1AL</i>                         | TRIAE_CS42_1AL_TGACv1_002261_AA0040140.2          | 972                          |
|                |                          | <i>TaNOX3-1DL</i>                         | TRIAE_CS42_1DL_TGACv1_061195_AA0188450.1          | 1160                         |
|                |                          | <i>TaNOX4-1DL</i>                         | TRIAE_CS42_1DL_TGACv1_061195_AA0188480.1          | 999                          |
|                |                          | <i>TaNOX5-3AL</i>                         | TRIAE_CS42_3AL_TGACv1_195088_AA0644550.1          | 851                          |
|                |                          | <i>TaNOX6-3AL</i>                         | TRIAE_CS42_3AL_TGACv1_195736_AA0653240.3          | 976                          |
|                |                          | <i>TaNOX7-3AS</i>                         | TRIAE_CS42_3AS_TGACv1_211536_AA0691290.1          | 901                          |
|                |                          | <i>TaNOX8-4DL</i>                         | TRIAE_CS42_4DL_TGACv1_343050_AA1128500.1          | 841                          |
|                |                          | <i>TaNOX9-4DL</i>                         | TRIAE_CS42_4DL_TGACv1_343029_AA1127810.3          | 921                          |
|                |                          | <i>TaNOX10-5BL</i>                        | BankIt2018780 Seq1MF166871(provided by gene bank) | 918                          |
|                |                          | <i>TaNOX11-5AL</i>                        | TRIAE_CS42_5AL_TGACv1_375026_AA1214240.1          | 919                          |
|                |                          | <i>TaNOX12-5DL</i>                        | TRIAE_CS42_5DL_TGACv1_433213_AA1405680.1          | 994                          |
|                |                          | <i>TaNOX13-5AL</i>                        | TRIAE_CS42_5AL_TGACv1_377290_AA1245640.1          | 847                          |
|                |                          | <i>TaNOX14-5AS</i>                        | TRIAE_CS42_5AS_TGACv1_393979_AA1277500.2          | 877                          |
|                |                          | <i>TaNOX15-6BS</i>                        | TRIAE_CS42_6BS_TGACv1_513624_AA1646010.1          | 957                          |
|                |                          | <i>TaNOX-like1-1AL</i>                    | TRIAE_CS42_1AL_TGACv1_001598_AA0032710.1          | 651                          |
|                |                          | <i>TaNOX-like2-1BL</i>                    | TRIAE_CS42_1BL_TGACv1_030295_AA0085740.1          | 675                          |
|                |                          | <i>TaNOX-like3-1BL</i>                    | TRIAE_CS42_1BL_TGACv1_032482_AA0130380.1          | 602                          |
|                |                          | <i>TaNOX-like4-6DS</i>                    | TRIAE_CS42_6DS_TGACv1_542557_AA1724240.1          | 506                          |
|                |                          | <i>TaFRO1-1DL</i>                         | TRIAE_CS42_1DL_TGACv1_061711_AA0202110.1          | 823                          |
|                |                          | <i>TaFRO2-1BL</i>                         | TRIAE_CS42_1BL_TGACv1_031571_AA0116350.2          | 670                          |
|                |                          | <i>TaFRO3-2BL</i>                         | TRIAE_CS42_2BL_TGACv1_130340_AA0409100.1          | 806                          |
|                |                          | <i>TaFRO4-2AL</i>                         | TRIAE_CS42_2AL_TGACv1_093999_AA0290910.1          | 776                          |
|                |                          | <i>Triticum urartu</i>                    | <i>TuNOX1</i>                                     | Triticum_urartu_TRIUR3_04873 |
|                | <i>TuNOX2</i>            |                                           | Triticum_urartu_TRIUR3_10760                      | 625                          |
|                | <i>TuNOX3</i>            |                                           | Triticum_urartu_TRIUR3_17466                      | 731                          |
|                | <i>TuNOX4</i>            |                                           | Triticum_urartu_TRIUR3_18286                      | 865                          |
|                | <i>TuNOX5</i>            |                                           | Triticum_urartu_TRIUR3_20633                      | 624                          |
|                | <i>TuNOX6</i>            |                                           | Triticum_urartu_TRIUR3_20792                      | 805                          |
|                | <i>TuNOX7</i>            |                                           | Triticum_urartu_TRIUR3_25647                      | 843                          |
|                | <i>TuNOX8</i>            |                                           | Triticum_urartu_TRIUR3_26076                      | 606                          |
|                | <i>TuFRO1</i>            |                                           | Triticum_urartu_TRIUR3_14484                      | 707                          |
|                | <i>TuFRO2</i>            |                                           | Triticum_urartu_TRIUR3_21493                      | 839                          |
|                | <i>Aegilops tauschii</i> | <i>AetNOX1</i>                            | Aegilops_tauschii_F775_05767                      | 946                          |
| <i>AetNOX2</i> |                          | Aegilops_tauschii_F775_06338              | 731                                               |                              |
| <i>AetNOX3</i> |                          | Aegilops_tauschii_F775_08558              | 797                                               |                              |
| <i>AetNOX4</i> |                          | Aegilops_tauschii_F775_11876              | 669                                               |                              |
| <i>AetNOX5</i> |                          | Aegilops_tauschii_F775_16752              | 726                                               |                              |
| <i>AetNOX6</i> |                          | Aegilops_tauschii_F775_18726              | 1091                                              |                              |
| <i>AetNOX7</i> |                          | Aegilops_tauschii_F775_21135              | 600                                               |                              |
| <i>AetNOX8</i> |                          | Aegilops_tauschii_F775_28509              | 726                                               |                              |



**Table S2. Continued**

| Lineages | Species | Nomenclature<br><i>NOX</i> and <i>FRO</i> | Gene ID                        | A.A.                            |      |
|----------|---------|-------------------------------------------|--------------------------------|---------------------------------|------|
| Monocots |         | <i>AetFRO1</i>                            | Aegilops_tauschii_F775_08531   | 639                             |      |
|          |         | <i>AetNOX9</i>                            | Aegilops_tauschii_F775_30688   | 717                             |      |
|          |         | <i>AetNOX10</i>                           | Aegilops_tauschii_F775_52502   | 1176                            |      |
|          |         | <i>AetFRO2</i>                            | Aegilops_tauschii_F775_09519   | 707                             |      |
|          |         | <i>AetFRO3</i>                            | Aegilops_tauschii_F775_10160   | 707                             |      |
|          |         | <i>HvNOX1</i>                             | Hordeum_vulgare_MLOC_5021      | 845                             |      |
|          |         | <i>HvNOX2</i>                             | Hordeum_vulgare_MLOC_5633      | 862                             |      |
|          |         | <i>HvNOX3</i>                             | Hordeum_vulgare_MLOC_11469     | 832                             |      |
|          |         | <i>HvNOX4</i>                             | Hordeum_vulgare_MLOC_51084     | 807                             |      |
|          |         | <i>HvNOX5</i>                             | Hordeum_vulgare_MLOC_54087     | 726                             |      |
|          |         | <i>HvNOX6</i>                             | Hordeum_vulgare_MLOC_73746     | 720                             |      |
|          |         | <i>HvNOX7</i>                             | Hordeum_vulgare_MLOC_81745     | 906                             |      |
|          |         | <i>HvFRO1</i>                             | Hordeum_vulgare_MLOC_63739     | 602                             |      |
|          |         | <i>HvFRO2</i>                             | Hordeum_vulgare_MLOC_77866     | 515                             |      |
|          |         | <i>Brachypodium distachyon</i>            | <i>BdNOX1</i>                  | Bradi2g12790.2 (BD2G12790)      | 901  |
|          |         |                                           | <i>BdNOX2</i>                  | Bradi2g19090.1 (BD2G19090)      | 989  |
|          |         |                                           | <i>BdNOX3</i>                  | Bradi2g22820.1 (BD2G22820)      | 835  |
|          |         |                                           | <i>BdNOX4</i>                  | Bradi2g49040.1 (BD2G49040)      | 943  |
|          |         |                                           | <i>BdNOX5</i>                  | Bradi2g54240.1 (BD2G54240)      | 845  |
|          |         |                                           | <i>BdNOX6</i>                  | Bradi3g37530.1 (BD3G37530)      | 987  |
|          |         |                                           | <i>BdNOX7</i>                  | Bradi4g05540.1 (BD4G05540)      | 856  |
|          |         |                                           | <i>BdNOX8</i>                  | Bradi4g17020.1 (BD4G17020)      | 924  |
|          |         |                                           | <i>BdNOX9</i>                  | Bradi4g31130.1 (BD4G31130)      | 991  |
|          |         |                                           | <i>BdFRO1</i>                  | Bradi5g11147.1 (BD5G11147)      | 758  |
|          |         |                                           | <i>BdFRO2</i>                  | Bradi5g19150.1 (BD5G19150)      | 735  |
|          |         | <i>Oryza sativa</i>                       | <i>OsNOX1</i>                  | LOC_Os01g25820.1 (Os01g0360200) | 880  |
|          |         |                                           | <i>OsNOX2</i>                  | LOC_Os01g53294.1 (Os01g0734466) | 727  |
|          |         |                                           | <i>OsNOX3</i>                  | LOC_Os01g61880.1 (Os01g0835500) | 843  |
|          |         |                                           | <i>OsNOX4</i>                  | LOC_Os05g38980.1 (Os05g0465800) | 819  |
|          |         |                                           | <i>OsNOX5</i>                  | LOC_Os05g45210.1 (Os05g0528000) | 951  |
|          |         |                                           | <i>OsNOX6</i>                  | LOC_Os08g35210.1 (Os08g0453700) | 1033 |
|          |         |                                           | <i>OsNOX7</i>                  | LOC_Os09g26660.1 (Os09g0438000) | 1007 |
|          |         |                                           | <i>OsNOX8</i>                  | LOC_Os11g33120.1 (Os11g0537400) | 936  |
|          |         |                                           | <i>OsNOX9</i>                  | LOC_Os12g35610.1 (Os12g0541300) | 892  |
|          |         |                                           | <i>OsFRO1</i>                  | LOC_Os04g36720.1 (Os04g0444800) | 758  |
|          |         |                                           | <i>OsFRO2</i>                  | LOC_Os04g48930.1 (Os04g0578600) | 525  |
|          |         | <i>Zea mays</i>                           | <i>ZmNOX1</i>                  | GRMZM2G448185_T01 (ZM01G37420)  | 1009 |
|          |         | <i>ZmNOX2</i>                             | GRMZM2G065144_T01 (ZM02G42940) | 948                             |      |
|          |         | <i>ZmNOX3</i>                             | GRMZM2G358619_T01 (ZM02G42960) | 976                             |      |
|          |         | <i>ZmNOX4</i>                             | GRMZM2G037993_T01 (ZM02G42980) | 882                             |      |
|          |         | <i>ZmNOX5</i>                             | GRMZM2G034896_T01 (ZM03G12260) | 921                             |      |
|          |         | <i>ZmNOX6</i>                             | GRMZM2G401179_T01 (ZM03G14570) | 842                             |      |
|          |         | <i>ZmNOX7</i>                             | GRMZM2G426953_T01 (ZM03G27690) | 852                             |      |

**Table S2. Continued**

| Lineages | Species                     | Nomenclature<br><i>NOX</i> and <i>FRO</i> | Gene ID                           | A.A. |
|----------|-----------------------------|-------------------------------------------|-----------------------------------|------|
|          |                             | <i>ZmNOX8</i>                             | GRMZM2G138152_T01 (ZM03G32550)    | 943  |
|          |                             | <i>ZmNOX9</i>                             | GRMZM2G441541_T03 (ZM04G30500)    | 932  |
|          |                             | <i>ZmNOX10</i>                            | GRMZM2G043435_T01 (ZM06G29020)    | 948  |
|          |                             | <i>ZmNOX11</i>                            | GRMZM2G147966_T01 (ZM07G15130/40) | 999  |
|          |                             | <i>ZmNOX12</i>                            | GRMZM2G022547_T02 (ZM08G08220)    | 897  |
|          |                             | <i>ZmNOX13</i>                            | GRMZM2G323731_T01 (ZM08G08900)    | 822  |
|          |                             | <i>ZmNOX14</i>                            | GRMZM2G300965_T01 (ZM10G04920)    | 931  |
|          |                             | <i>ZmFRO1</i>                             | GRMZM2G089291_T01 (ZM01G20940)    | 624  |
|          |                             | <i>ZmFRO2</i>                             | GRMZM2G068557_T01 (ZM02G14250)    | 760  |
| Eudicots | <i>Arabidopsis thaliana</i> | <i>AtRBOHA</i>                            | AT5G07390.1                       | 902  |
|          |                             | <i>AtRBOHB</i>                            | AT1G09090.1                       | 843  |
|          |                             | <i>AtRBOHC</i>                            | AT5G51060.1                       | 905  |
|          |                             | <i>AtRBOHD</i>                            | AT5G47910.1                       | 921  |
|          |                             | <i>AtRBOHE</i>                            | AT1G19230.1                       | 934  |
|          |                             | <i>AtRBOHF</i>                            | AT1G64060.1                       | 944  |
|          |                             | <i>AtRBOHG</i>                            | AT4G25090.1                       | 849  |
|          |                             | <i>AtRBOHH</i>                            | AT5G60010.1                       | 886  |
|          |                             | <i>AtRBOHI</i>                            | AT4G11230.1                       | 941  |
|          |                             | <i>AtRBOHJ</i>                            | AT3G45810.1                       | 912  |
|          |                             | <i>AtFRO1</i>                             | AT1G01590.1                       | 704  |
|          |                             | <i>AtFRO2</i>                             | AT1G01580.1                       | 725  |
|          |                             | <i>AtFRO3</i>                             | AT1G23020.1                       | 717  |
|          |                             | <i>AtFRO4</i>                             | AT5G23980.1                       | 699  |
|          |                             | <i>AtFRO5</i>                             | AT5G23990.1                       | 657  |
|          |                             | <i>AtFRO6</i>                             | AT5G49730.1                       | 738  |
|          |                             | <i>AtFRO7</i>                             | AT5G49740.1                       | 747  |
|          |                             | <i>AtFRO8</i>                             | AT5G50160.1                       | 728  |

**Table S3. The identical percentage of amino acids sequences between homologue gene pairs**

| <b>Subgroups</b> | <b>Homologue gene pairs</b> |                    | <b>Identical percentage / %</b> |
|------------------|-----------------------------|--------------------|---------------------------------|
| I                | <i>TaNOX11-5AL</i>          | <i>TaNOX9-4DL</i>  | 98.7                            |
|                  | <i>TaNOX9-4DL</i>           | <i>BdNOX8</i>      | 89                              |
|                  | <i>TaNOX10-5BL</i>          | <i>AetNOX4</i>     | 98.9                            |
|                  | <i>TaNOX3-1DL</i>           | <i>AetNOX6</i>     | 98.7                            |
|                  | <i>TaNOX4-1DL</i>           | <i>OsNOX8</i>      | 74.3                            |
|                  | <i>TaNOX15-6BS</i>          | <i>TaNOX-like4</i> | 97.9                            |
| II               | <i>TaNOX12-5DL</i>          | <i>OsNOX7</i>      | 93.3%                           |
|                  | <i>TaNOX12-5DL</i>          | <i>BdNOX9</i>      | 95.1%                           |
|                  | <i>TaNOX12-5DL</i>          | <i>ZmNOX11</i>     | 95.6%                           |
|                  | <i>TaNOX6-3AL</i>           | <i>TaNOX2-1AL</i>  | 86.6                            |
|                  | <i>TaNOX6-3AL</i>           | <i>ZmNOX8</i>      | 90.8                            |
|                  | <i>TaNOX2-1AL</i>           | <i>OsNOX2</i>      | 88.4                            |
| III              | <i>TaNOX13-5AL</i>          | <i>TaNOX8-4DL</i>  | 97.5                            |
|                  | <i>TaNOX13-5AL</i>          | <i>ZmNOX12</i>     | 88.8                            |
|                  | <i>TaNOX8-4DL</i>           | <i>ZmNOX12</i>     | 87.5                            |
|                  | <i>TaNOX14-5AS</i>          | <i>OsNOX9</i>      | 86.3                            |
|                  | <i>TaNOX7-3AS</i>           | <i>OsNOX1</i>      | 87.3                            |
|                  | <i>TaNOX7-3AS</i>           | <i>ZmNOX5</i>      | 81.2                            |
| IV               | <i>TaNOX-like1</i>          | <i>AetNOX7</i>     | 52.1                            |
|                  | <i>TaNOX-like3</i>          | <i>AetNOX7</i>     | 59.8                            |
| V                | <i>TaNOX5-3AL</i>           | <i>OsNOX3</i>      | 90.8                            |
|                  | <i>TaNOX5-3AL</i>           | <i>AtRbohG</i>     | 64.3                            |
|                  | <i>TaNOX1-1BL</i>           | <i>AtRbohG</i>     | 65.9                            |
| VI               | <i>TaFRO3-2BL</i>           | <i>OsFRO1</i>      | 76.4                            |



**Table S4.** Rates of non-synonymous (Ka) and synonymous (Ks) nucleotide substitutions and their ratios ( $\omega$ ) for protein-coding nucleotide sequence of paralogous and orthologous gene pairs of NOX family genes in four species\*

| Gene pairs                                                                                           | Ka     | Ks     | $\omega$ (Ka/ Ks) | Divergence time (Mya) |
|------------------------------------------------------------------------------------------------------|--------|--------|-------------------|-----------------------|
| <b><i>Triticum aestivum</i> VS. <i>Triticum aestivum</i> (AABBDD, 2n = 6×= 42)</b>                   |        |        |                   |                       |
| <i>TaNOX4-1DL</i> VS. <i>TaNOX6-3AL</i>                                                              | 2.1470 | 1.7086 | 1.256584338       | 6.1166                |
| <i>TaNOX9-4DL</i> VS. <i>TaNOX10-5BL</i>                                                             | 1.2268 | 0.5256 | 2.334094368       | 3.1663                |
| <i>TaNOX1-1BL</i> VS. <i>TaNOX12-5DL</i>                                                             | 2.3250 | 1.3319 | 1.745626549       | 6.2533                |
| <i>TaNOX8-4DL</i> VS. <i>TaNOX13-5AL</i>                                                             | 0.0073 | 0.1414 | 0.051626591       | 0.1159                |
| <b><i>Triticum aestivum</i> (AABBDD, 2n = 6×= 42) VS. <i>Aegilops tauschii</i> (DD, 2n = 2×= 14)</b> |        |        |                   |                       |
| <i>TaNOX1-1BL</i> VS. <i>AetNOX3</i>                                                                 | 0.0087 | 0.0589 | 0.14770798        | 0.0606                |
| <i>TaNOX3-1DL</i> VS. <i>AetNOX6</i>                                                                 | 0.0084 | 0.0054 | 1.555555556       | 0.0231                |
| <i>TaNOX5-3AL</i> VS. <i>AetNOX2</i>                                                                 | 0.0054 | 0.0613 | 0.088091354       | 0.0551                |
| <i>TaNOX10-5BL</i> VS. <i>AetNOX4</i>                                                                | 0.0200 | 0.0692 | 0.289017341       | 0.0955                |
| <i>TaNOX4-1DL</i> VS. <i>AetNOX10</i>                                                                | 0.0090 | 0.0074 | 1.216216216       | 0.0259                |
| <i>TaNOX7-3AS</i> VS. <i>AetNOX1</i>                                                                 | 0.0053 | 0.0424 | 0.125             | 0.0420                |
| <b><i>Triticum aestivum</i> (AABBDD, 2n = 6×= 42) VS. <i>Triticum urartu</i> (AA, 2n = 2×= 14)</b>   |        |        |                   |                       |
| <i>TaNOX1-1BL</i> VS. <i>TuNOX3</i>                                                                  | 0.0083 | 0.0757 | 0.109643329       | 0.0710                |
| <i>TaNOX2-1AL</i> VS. <i>TuNOX6</i>                                                                  | 0.0275 | 0.0421 | 0.653206651       | 0.0927                |
| <i>TaNOX3-1DL</i> VS. <i>TuNOX4</i>                                                                  | 0.1697 | 0.3622 | 0.468525676       | 0.6466                |
| <i>TaNOX11-5AL</i> VS. <i>TuNOX5</i>                                                                 | 0.0492 | 0.0784 | 0.62755102        | 0.1683                |
| <i>TaNOX12-5DL</i> VS. <i>TuNOX8</i>                                                                 | 0.0135 | 0.0810 | 0.166666667       | 0.0893                |
| <i>TaNOX13-5AL</i> VS. <i>TuNOX7</i>                                                                 | 0.0005 | 0.0069 | 0.072463768       | 0.0060                |
| <i>TaNOX14-5AS</i> VS. <i>TuNOX1</i>                                                                 | 0.0019 | 0.0039 | 0.487179487       | 0.0071                |
| <i>TaNOX15-6BS</i> VS. <i>TuNOX2</i>                                                                 | 0.0071 | 0.0948 | 0.074894515       | 0.0859                |
| <b><i>Triticum aestivum</i> (AABBDD, 2n = 6×= 42) VS. <i>Hordeum vulgare</i> (AA, 2n = 2×= 14)</b>   |        |        |                   |                       |
| <i>TaNOX1-1BL</i> VS. <i>HvNOX3</i>                                                                  | 0.0388 | 0.1388 | 0.279539          | 0.1853                |
| <i>TaNOX5-3AL</i> VS. <i>HvNOX4</i>                                                                  | 0.0032 | 0.0818 | 0.03912           | 0.0650                |
| <i>TaNOX6-3AL</i> VS. <i>HvNOX5</i>                                                                  | 0.0072 | 0.1728 | 0.041667          | 0.1384                |
| <i>TaNOX7-3AS</i> VS. <i>HvNOX6</i>                                                                  | 0.0196 | 0.1017 | 0.192724          | 0.1163                |
| <i>TaNOX14-5AS</i> VS. <i>HvNOX2</i>                                                                 | 0.0175 | 0.0821 | 0.213155          | 0.1003                |

\* The non-synonymous (Ka) and synonymous (Ks) were estimated for the paralogous and orthologous gene pairs of NOX family genes in four species, *Triticum aestivum*, *Aegilops tauschii*, *Triticum urartu* and *Hordeum vulgare*, by using the bioinformatics software pamlX1.2 based on the aligned CDS sequences of each orthologous and paralogous gene pairs which the terminator codons were removed. Divergence time (T, million years ago, Mya) for each paralogous gene pair was calculated using the average Ks of  $\lambda$  substitutions per synonymous sites per year as  $T = Ks/2\lambda$  ( $\lambda = 6.5 \times 10^{-9}$ ).

**Table S5. The detailed information of coexpression genes with the 8 *TaNOX* genes**

| Wheat <i>NOX</i> genes                                      | Coexpression genes<br>(probe ID) | PCC  | Functions of the coexpression genes                                                                     |
|-------------------------------------------------------------|----------------------------------|------|---------------------------------------------------------------------------------------------------------|
| <b>Coexpression genes at different developmental stages</b> |                                  |      |                                                                                                         |
| Traes_1DL_90d078159<br>( <i>TaNOX2-1DL</i> )                | Traes_1AL_7EAFBe83A              | 1    | Respiratory burst oxidase protein( <i>TaNOX2-1AL</i> )                                                  |
|                                                             | Traes_6DS_1FDCDEAD0              | 0.98 | Endoglucanase: ATP binding,InterProtein kinase activity                                                 |
|                                                             | Traes_1AL_0C0DFBE2C              | 0.98 | S-locus lectin protein kinase family protein: ATP bindingprotein,serine/threonine kinase activity       |
|                                                             | Traes_3DL_1B8FEA3D4              | 0.97 | DNase-like superfamily protein                                                                          |
|                                                             | Traes_2BL_3EA4A823D              | 0.97 | O-fucosyltransferase family protein                                                                     |
| Traes_1DL_7DA75D562<br>( <i>TaNOX3-1DL</i> )                | Traes_7DL_9A1D8C4F8              | 0.99 | Leucine-rich repeat protein kinase family protein: ATP binding protein,serine/threonine kinase activity |
|                                                             | Traes_3AS_0375B118B              | 0.98 | S-locus lectin protein kinase family protein: ATP bindingprotein,serine/threonine kinase activity       |
|                                                             | Traes_1AL_D25D2A8D7              | 0.98 | Respiratory burst oxidase homologue                                                                     |
|                                                             | Traes_4DS_8441B901C              | 0.98 | 2-oxoglutarate (2OG) and Fe(II)-dependent oxygenase: metal ion binding, oxidoreductase activity         |
|                                                             | Traes_2DL_1AF45DD78              | 0.98 | Phenylalanine ammonia-lyase 4                                                                           |
| Traes_3AS_6E3C01A0F<br>( <i>TaNOX7-3AS</i> )                | Traes_5AL_DC634F0A5              | 0.96 | Heavy metal transport detoxification superfamily protein                                                |
|                                                             | Traes_2AL_8DFB52620              | 0.96 | Leucine-rich repeat protein kinase family protein: ATP binding, protein tyrosine kinase activity        |
|                                                             | Traes_2DL_BBC49B973              | 0.95 | Kinesin motor domain containing protein                                                                 |
|                                                             | Traes_5BL_5CA61EE26              | 0.94 | DHHC-type zinc finger family protein                                                                    |
|                                                             | Traes_2DL_9F8AC7245              | 0.94 | CLIP-associated protein                                                                                 |
| Traes_4DL_9CC7EB9A1<br>( <i>TaNOX8-4DL</i> )                | Traes_6AL_B1E4E11A9              | 0.97 | Zinc finger (C3HC4-type RING finger) family protein                                                     |
|                                                             | Traes_1AS_10C467127              | 0.97 | CESA1-cellulose synthase                                                                                |
|                                                             | Traes_6AL_9A1102477              | 0.97 | SCAMP family protein: protein transport, secretory carrier membrane protein                             |
|                                                             | Traes_1DS_65C1FD8D8              | 0.96 | CESA1- cellulose synthase                                                                               |
|                                                             | Traes_4DL_1A9D268CC              | 0.96 | Remorin family protein                                                                                  |
| Traes_5BL_686C04088<br>( <i>TaNOX12-5BL</i> )               | Traes_5DS_A4147A90B              | 0.97 | Galactosyltransferase family protein                                                                    |
|                                                             | Traes_5BS_9A5DEAB72              | 0.95 | Galactosyltransferase family protein                                                                    |

**Table S5. Continued**

| Wheat <i>NOX</i> genes                         | Coexpression genes (probe ID) | PCC  | Functions of the coexpression genes                                                                                                           |
|------------------------------------------------|-------------------------------|------|-----------------------------------------------------------------------------------------------------------------------------------------------|
|                                                | Traes_5BL_C66D2A645           | 0.94 | Transport protein particle(TRAPP) component, pollen tube development, response to abscisic acid                                               |
|                                                | Traes_3DL_D5689EBBD           | 0.93 | SCD1                                                                                                                                          |
|                                                | Traes_5DL_9269C8E24           | 0.92 | RING/FYVE/PHD zinc finger superfamily protein                                                                                                 |
| Traes_5AL_68844CE9B<br>( <i>TaNOX13-5AL</i> )  | Traes_4BL_25A23A7EC           | 0.97 | Respiratory burst oxidase homolog B( <i>TaNOX8BL</i> )                                                                                        |
|                                                | Traes_3AL_2A172A963           | 0.97 | CTP synthase family protein: catalyzes the ATP-dependent amination of UTP to CTP with either L-glutamine or ammonia as the source of nitrogen |
|                                                | Traes_4BS_3C51F0E6A           | 0.96 | Hydroxyproline-rich glycoprotein family protein                                                                                               |
|                                                | Traes_2AL_6A34123EE           | 0.96 | Arogenate dehydratase 6                                                                                                                       |
|                                                | Traes_2BL_BE5A3DB2F           | 0.96 | Glutaredoxin family protein: electron carrier activity; protein disulfide oxidoreductase activity; cell redox homeostasis                     |
| Traes_2BL_C7CDCB39A<br>( <i>TaFRO3-2BL</i> )   | Traes_2DL_AB324879E/          | 0.99 | Ferric reduction oxidase ( <i>TaFRO3DL</i> )                                                                                                  |
|                                                | Traes_2AL_2A274FDB8/          | 0.99 | Ferric reduction oxidase ( <i>TaFRO3AL</i> )                                                                                                  |
|                                                | Traes_1BS_9DA08515E           | 0.98 | HXXXD-type acyl-transferase family protein                                                                                                    |
|                                                | Traes_1DS_6CF7BB6E8           | 0.98 | Concanavalin A-like lectin protein kinase family protein: ATP binding,protein kinase activity                                                 |
|                                                | Traes_1DS_BD30088EB           | 0.98 | Protein kinase family protein: ATP binding,protein kinase activity                                                                            |
| Traes_2BL_E11AA2D03<br>( <i>TaFRO4-2BL</i> )   | Traes_4DL_5479D9B02           | 0.96 | Mechanosensitive channel of small conductance-like: Atransmembrane transport                                                                  |
|                                                | Traes_6AS_28752C23C           | 0.96 | Chloride channel: voltage-gated chloride channel activity                                                                                     |
|                                                | Traes_1BS_6681FE545           | 0.95 | Cysteine-rich repeat secretory protein 55 precursor                                                                                           |
|                                                | Traes_1AL_A2DA8A6AE           | 0.95 | Cytokinin dehydrogenase precursor, putative, expressed                                                                                        |
|                                                | Traes_5DL_AF588196A           | 0.95 | UDP-glucosyl transferase 73C2                                                                                                                 |
| <b>Coexpression genes in different tissues</b> |                               |      |                                                                                                                                               |
| Traes_1DL_90d078159<br>( <i>TaNOX2-1DL</i> )   | Traes_1AL_7EAFBE83A           | 0.95 | Respiratory burst oxidase Protein F( <i>TaNOX2AL</i> )                                                                                        |
|                                                | Traes_5AL_68844CE9B           | 0.92 | Respiratory burst oxidase homologue B( <i>TaNOX13AL</i> )                                                                                     |



**Table S5. Continued**

| Wheat <i>NOX</i> genes                       | Coexpression genes<br>(probe ID) | PCC  | Functions of the coexpression genes                                                                                                                                            |
|----------------------------------------------|----------------------------------|------|--------------------------------------------------------------------------------------------------------------------------------------------------------------------------------|
|                                              | Traes_4BS_3C51F0E6A              | 0.91 | Hydroxyproline-rich glycoprotein family protein                                                                                                                                |
|                                              | Traes_5DL_69136BDBF              | 0.90 | CK1_CaseinKinase_1.5-CK1 includes the casein kin: ATP binding, protein kinase activity                                                                                         |
|                                              | Traes_1BL_722A8B838              | 0.90 | Respiratory burst oxidase Protein F (TaNOX2BL)                                                                                                                                 |
|                                              | Traes_4BL_25A23A7EC              | 0.90 | Respiratory burst oxidase homologue B( TaNOX8BL)                                                                                                                               |
|                                              | Traes_5DL_3B0E69498              | 0.90 | CESA5-cellulose synthase                                                                                                                                                       |
|                                              | Traes_4AL_941C0E3EF              | 0.98 | CESA3-cellulose synthase                                                                                                                                                       |
| Traes_1DL_7DA75D562<br>( <i>TaNOX3-1DL</i> ) | Traes_4AL_99321A74E              | 0.96 | LRR and NB-ARC domains-containing resistance protein: leucine rich repeats(LRRs) play an important role in plant growth, development, disease resistance and defense mechanism |
|                                              | Traes_7BL_6A5BF370F              | 0.96 | Leucine-rich repeat protein kinase family protein                                                                                                                              |
|                                              | Traes_2BL_038AD2792              | 0.95 | Hydrolase, NUDIX family, domain containing protein                                                                                                                             |
|                                              | Traes_6BL_D3351F016              | 0.95 | Phytosulfokin receptor 1                                                                                                                                                       |
|                                              | Traes_6AL_D7BCBDB26              | 0.94 | Phytosulfokin receptor 1                                                                                                                                                       |
|                                              | Traes_4AL_CE5670268              | 0.94 | RNG/U-box superfamily protein                                                                                                                                                  |
|                                              | Traes_2DL_1AF45DD78              | 0.92 | Phenylalanine ammonia-lyase 4                                                                                                                                                  |
|                                              | Traes_7BL_4BFC61ADC              | 0.92 | Leucine-rich repeat protein kinase family protein                                                                                                                              |
|                                              | Traes_6AL_FCD808A2C              | 0.92 | Phytosulfokin receptor 1                                                                                                                                                       |
| Traes_3AS_6E3C01A0F<br>( <i>TaNOX7-3AS</i> ) | Traes_6DS_B6E53FECE              | 0.90 | Single hybrid motif superfamily protein                                                                                                                                        |
|                                              | Traes_2AS_781AFB224              | 0.89 | DHHC-type zinc finger family protein: have palmitoyltransferase activity, (posseses a positive control function in tiller of rice)                                             |
|                                              | Traes_6BS_04456A8F7              | 0.84 | Single hybrid motif superfamily protein                                                                                                                                        |
|                                              | Traes_7DL_5740935BB              | 0.84 | Endomembrane protein 70 protein family                                                                                                                                         |
|                                              | Traes_7AS_B0AA62C31              | 0.83 | P-loop containing nucleoside triphosphate hydrolases: GTPase activity                                                                                                          |
|                                              | Traes_5BS_18894                  | 0.79 | Pectin lyase-like superfamily protein                                                                                                                                          |

**Table S5. Continued**

| Wheat <i>NOX</i> genes                        | Coexpression genes<br>(probe ID) | PCC  | Functions of the coexpression genes                                                           |
|-----------------------------------------------|----------------------------------|------|-----------------------------------------------------------------------------------------------|
|                                               | Traes_5DS_A4147                  | 0.79 | Galactosyltransferase family protein                                                          |
|                                               | Traes_5AL_4F1B2                  | 0.79 | PLC-like phosphodiesterases superfamily protein                                               |
|                                               | Traes_5AL_53530                  | 0.79 | E3 ubiquitin- protein ligase HERC2                                                            |
|                                               | Traes_4BS_98118                  | 0.78 | Heavy metal transport/detoxification superfamily protein                                      |
| Traes_4DL_9CC7EB9A1<br>( <i>TaNOX8-4DL</i> )  | Traes_3AL_C178A21CD              | 0.95 | Glyoxalase II 3                                                                               |
|                                               | Traes_1AL_097DB7389              | 0.94 | Kinesin motor family protein                                                                  |
|                                               | Traes_7AS_402479BA7              | 0.93 | UDP-Glycosyltransferase superfamily protein: metal ion binding,methyltransferase activity     |
|                                               | Traes_1BL_A1DF11589              | 0.92 | Kinesin motor family protein: microtubule motor activity,ATP binding                          |
|                                               | Traes_1DL_81F0B978E              | 0.91 | 3-hydroxyacyl-CoA dehydrogenase, putative, expressed                                          |
|                                               | Traes_5DL_D4AC8C679              | 0.90 | COPI-interacting protein-related protein                                                      |
|                                               | Traes_5AL_68844CE9B              | 0.88 | Respiratory burst oxidase homologue B( <i>TaNOX13AL</i> )                                     |
|                                               | Traes_5DS_D966200E0              | 0.87 | Plectin-related protein                                                                       |
| Traes_5BL_686C04088<br>( <i>TaNOX12-5BL</i> ) | Traes_5AL_12FDD7791              | 0.96 | Riboflavin synthase-like superfamily protein                                                  |
|                                               | Traes_2BS_E6AA149D1              | 0.92 | Glycoprotein membrane precursor GPI-anchored                                                  |
|                                               | Traes_1DS_0DF78825D              | 0.91 | GDSL-like Lipase/Acylhydrolase superfamily protein: hydrolase activity, acting on ester bonds |
|                                               | Traes_2BS_151CAEDED              | 0.91 | Heavy metal transport/detoxification superfamily protein                                      |
|                                               | Traes_1BL_A043C812A              | 0.89 | Glycosyltransferase family 61 protein                                                         |
|                                               | Traes_5DL_51E9FC7F9              | 0.88 | Riboflavin synthase-like superfamily protein                                                  |
|                                               | Traes_5DS_679D25F0E              | 0.87 | PLC-like phosphodiesterases superfamily protein                                               |
|                                               | Traes_4BL_A49A5AE66              | 0.86 | Glucuronidase                                                                                 |
|                                               | Traes_2BL_D3C4F1A02              | 0.84 | Ubiquitin-specific protease family C19-related protein                                        |
| Traes_5AL_68844CE9B<br>( <i>TaNOX13-5AL</i> ) | Traes_4BL_A632599AF              | 0.95 | Respiratory burst oxidase homologue D ( <i>TaNOX8BL</i> )                                     |
|                                               | Traes_4BL_25A23A7EC              | 0.95 | Respiratory burst oxidase homologue B ( <i>TaNOX8BL</i> )                                     |

**Table S5. Continued**

| Wheat <i>NOX</i> genes                             | Coexpression genes<br>(probe ID) | PCC  | Functions of the coexpression genes                                                                                    |
|----------------------------------------------------|----------------------------------|------|------------------------------------------------------------------------------------------------------------------------|
|                                                    | Traes_1AL_7EAFBE83A              | 0.94 | Respiratory burst oxidase protein F (TaNOX2AL)                                                                         |
|                                                    | Traes_6DS_85BB674BE              | 0.94 | IQ calmodulin-binding motif family protein                                                                             |
|                                                    | Traes_5DL_69136BDBF              | 0.92 | CK1_CaseinKinase_1.5-CK1 includes the casein kin: ATP binding, protein kinase activity                                 |
|                                                    | Traes_4BS_3C51F0E6A              | 0.91 | Hydroxyproline-rich glycoprotein family protein                                                                        |
|                                                    | Traes_5DL_CC0CB6BD4              | 0.91 | Heavy metal transport/detoxification superfamily protein                                                               |
|                                                    | Traes_6AS_CF6D8CD28              | 0.90 | CESA1- cellulose synthase                                                                                              |
| Traes_2BL_C7CDCB39A                                | Traes_2DL_AB324879E              | 0.99 | Ferric reduction oxidase 7 ( TaFRO3DL)                                                                                 |
| ( <i>TaFRO3-2BL</i> )                              | Traes_2AL_2A274FDB8              | 0.99 | Ferric reduction oxidase 6 (TaFRO3AL)                                                                                  |
|                                                    | Traes_6DL_0EF6FCB35              | 0.95 | Leucine-rich repeat protein kinase family protein: ATP binding, protein,serine/threonine kinase activity               |
|                                                    | Traes_6DS_B856A1DFE              | 0.95 | Cyclase family protein: arylformamidase activity,tryptophan catabolic process to kynurenine                            |
|                                                    | Traes_4BL_AA1E9E3CF              | 0.95 | BTBN5-Bric-a-Brac, Tramtrack, Broad Complex BTB d                                                                      |
| Traes_2BL_E11AA2D03                                | Traes_2AL_1FA49CAC2              | 0.96 | Ferric reduction oxidase 4 ( TaFRO4AL): oxidoreductase activity                                                        |
| ( <i>TaFRO4-2BL</i> )                              | Traes_2AL_C779F3245              | 0.94 | Ferric reduction oxidase 2                                                                                             |
|                                                    | Traes_2DS_CAD0529AF              | 0.93 | EF hand family protein: calcium ion binding                                                                            |
|                                                    | Traes_2AL_7E818894E              | 0.92 | Ferric reduction oxidase 1:oxidoreductase activity ( TaFRO4-2AL )                                                      |
|                                                    | Traes_2BS_7E04C0EE9              | 0.92 | Calcium-binding EF-hand family protein: calcium ion binding                                                            |
| <b>Coexpression genes under different stresses</b> |                                  |      |                                                                                                                        |
| Traes_1DL_90d078159                                | Traes_1AL_7EAFBE83A              | 0.90 | Respiratory burst oxidase protein(TaNOX2AL)                                                                            |
| ( <i>TaNOX2-1DL</i> )                              | Traes_3AL_C74E7BDC7              | 0.77 | S-adenosyl-L-methionine-dependent methyltransferase: methyltransferase activity                                        |
|                                                    | Traes_1BL_39BCEB359              | 0.76 | ATP synthase alpha/beta family protein: Produces ATP from ADP in the presence of a proton gradient across the membrane |
|                                                    | Traes_7DL_517D4C7AE              | 0.75 | Protein kinase superfamily protein: ATP binding, protein serine/threonine kinase activity                              |
|                                                    | Traes_7BS_6A3290A89              | 0.74 | Selenoprotein O, putative, expressed                                                                                   |

**Table S5. Continued**

| Wheat <i>NOX</i> genes                       | Coexpression genes<br>(probe ID) | PCC  | Functions of the coexpression genes                                                    |
|----------------------------------------------|----------------------------------|------|----------------------------------------------------------------------------------------|
|                                              | Traes_4AS_174B77945              | 0.74 | SAC domain proteins                                                                    |
|                                              | Traes_6DL_492F66EC5              | 0.74 | Diacylglycerol kinase 7                                                                |
|                                              | Traes_2BL_4B61A6D62              | 0.74 | Ubiquitin-specific protease family C19-related protein                                 |
|                                              | Traes_6DL_3916D7112              | 0.73 | ARM repeat superfamily protein                                                         |
| Traes_1DL_7DA75D562<br>( <i>TaNOX3-1DL</i> ) | Traes_5BL_CF34FCA90              | 0.93 | Respiratory burst oxidase homologue D                                                  |
|                                              | Traes_1AL_D25D2A8D7              | 0.92 | Respiratory burst oxidase homologue D ( <i>TaNOX1AL</i> )                              |
|                                              | Traes_4DL_F13AD3A4B              | 0.91 | NADPH/respiratory burst oxidase protein D                                              |
|                                              | Traes_2AS_CE5E5F0A1              | 0.90 | Brassinosteroid Insensitive 1 precursor kinase                                         |
|                                              | Traes_4BL_8D8410395              | 0.90 | Respiratory burst oxidase homologue D                                                  |
|                                              | Traes_2BL_AE761AE4B              | 0.89 | Brassinosteroid Insensitive 1 precursor kinase                                         |
|                                              | Traes_2AL_3FE5DF00C              | 0.88 | Alternative oxidase 1A                                                                 |
|                                              | Traes_6BL_8ECA4665C              | 0.87 | ANTH (anthocyanin)                                                                     |
|                                              | Traes_3AL_C777CC194              | 0.87 | Glutathione S-transferase tau 7                                                        |
|                                              | Traes_5BL_83737603B*             | 0.87 | RING/U-box superfamily protein: alternative oxidase activity, Binds 2 ions per subunit |
| Traes_3AS_6E3C01A0F<br>( <i>TaNOX7-3AS</i> ) | Traes_5BL_194BD8F31              | 0.91 | PLC-like phosphodiesterases superfamily protein: phosphoric diester hydrolase activity |
|                                              | Traes_7AL_07460F582              | 0.91 | Disease resistance protein (CC-NBS-LRR) family protein                                 |
|                                              | Traes_5DL_5D984B791              | 0.88 | PLC-like phosphodiesterases superfamily protein: phosphoric diester hydrolase activity |
|                                              | Traes_4BL_7FD3C9BC1              | 0.88 | O-fucosyltransferase family protein                                                    |
|                                              | Traes_5AL_4F1B2EB5D              | 0.88 | PLC-like phosphodiesterases superfamily protein: phosphoric diester hydrolase activity |
|                                              | Traes_4DL_53D175966              | 0.87 | LRR family protein                                                                     |
|                                              | Traes_6AL_3712E0E1C              | 0.87 | Melibiose family protein                                                               |
|                                              | Traes_3AS_5B7E5A95F              | 0.87 | FAD/NAD(P)-binding oxidoreductase                                                      |
|                                              | Traes_7DS_C8B29D1D2              | 0.87 | ARG1-like 1; heat shock protein                                                        |



**Table S5. Continued**

| Wheat <i>NOX</i> genes                        | Coexpression genes<br>(probe ID) | PCC  | Functions of the coexpression genes                                                                      |
|-----------------------------------------------|----------------------------------|------|----------------------------------------------------------------------------------------------------------|
| Traes_4DL_9CC7EB9A1<br>( <i>TaNOX8-4DL</i> )  | Traes_2DS_C80293002              | 0.84 | CESA8-cellulose synthase                                                                                 |
|                                               | Traes_1AL_881882915              | 0.83 | Myosin heavy chain-related protein                                                                       |
|                                               | Traes_1BL_2CC655472              | 0.82 | Retrotransposon protein, putative, tyl-copia subclass                                                    |
|                                               | Traes_2BS_064B02A89              | 0.82 | CESA8-cellulose synthase                                                                                 |
|                                               | Traes_2DS_D6AD8E3ED              | 0.81 | GDP-fucose protein-O-fucosyltransferase2                                                                 |
|                                               | Traes_5BL_3724A613A              | 0.80 | COPI interacting protein-related                                                                         |
|                                               | Traes_5DL_D4AC8C679              | 0.80 | COPI interacting protein-related                                                                         |
|                                               | Traes_5BL_5732BA252              | 0.80 | COPI interacting protein-related                                                                         |
|                                               | Traes_2BS_A90182710              | 0.80 | ARM repeat superfamily protein                                                                           |
| Traes_5BL_686C04088<br>( <i>TaNOX12-5BL</i> ) | Traes_6AL_AE01DC0EA              | 0.75 | Starch synthase 2 (projected from AT3G01180):glycogen (starch) synthase activity                         |
|                                               | Traes_4AS_D9BB27735              | 0.75 | Expressed protein ( projected from LOC_Os12g21789): hydrolase activity, hydrolyzing O-glycosyl compounds |
|                                               | Traes_3DL_AE478655F              | 0.74 | Alpha/beta-Hydrolases superfamily protein                                                                |
|                                               | Traes_7AS_FC99B645C              | 0.74 | CRAL/TRIO domain containing protein                                                                      |
|                                               | Traes_2BS_40E324D13              | 0.74 | Aquaporin protein: transporter activity                                                                  |
|                                               | Traes_5AL_12FDD7791              | 0.74 | Riboflavin synthase-like superfamily protein                                                             |
|                                               | Traes_5BL_D88C59519              | 0.72 | NADP-dependent oxidoreductase                                                                            |
|                                               | Traes_2BS_764ACA81C              | 0.72 | 4-alpha-glucanotransferase                                                                               |
|                                               | Traes_7BS_C25A31FF8              | 0.71 | Cytochrome p450 superfamily protein                                                                      |
| Traes_5AL_68844CE9B<br>( <i>TaNOX13-5AL</i> ) | Traes_6DL_32BCCED8B              | 0.79 | Melibiase family protein: catalase activity                                                              |
|                                               | Traes_2DS_C80293002              | 0.77 | CESA8-cellulose synthase                                                                                 |
|                                               | Traes_5DL_D4AC8C679              | 0.77 | COPI interacting protein-related                                                                         |
|                                               | Traes_1AL_EEFF7B5F8              | 0.77 | NAD kinase 1: NAD <sup>+</sup> kinase activity, NAD metabolic process, NADP biosynthetic process         |
|                                               | Traes_5BL_5732BA252              | 0.77 | COPI interacting protein-related                                                                         |

Table S5. Continued

| Wheat <i>NOX</i> genes | Coexpression genes<br>(probe ID) | PCC  | Functions of the coexpression genes                                                                 |
|------------------------|----------------------------------|------|-----------------------------------------------------------------------------------------------------|
|                        | Traes_6DL_32BCCED8B              | 0.79 | Melibiase family protein                                                                            |
|                        | Traes_2AS_665AF9500              | 0.76 | CESA8-cellulose synthase                                                                            |
|                        | Traes_7AL_354EEE44E              | 0.76 | OsIAA21-Auxin-responsive Aux/IAA gene family member                                                 |
|                        | Traes_5DS_268147383              | 0.74 | plant specific transcription factor YABBY family protein                                            |
|                        | Traes_6BL_CA144B632              | 0.74 | NB-ARC domain containing disease resistance protein                                                 |
| Traes_2BL_C7CDCB39A    | Traes_2AL_2A274FDB8              | 0.97 | Ferric reduction oxidase 6 (TaFRO3AL)                                                               |
| ( <i>TaFRO3-2BL</i> )  | Traes_2DL_AB324879E              | 0.96 | Ferric reduction oxidase 7 (TaFRO3DL)                                                               |
|                        | Traes_2BL_FD6E26509              | 0.93 | Pathogenesis-related BetvI family protein: defense response, response to biotic stimulus            |
|                        | Traes_1BL_C7D34F77C              | 0.93 | Disease resistance protein (CC-NBS-LRR class) family protein: ADP binding                           |
|                        | Traes_4AL_A0565AC4C              | 0.92 | RNA polymerase sigma factor, putative: transcription factor activity, sequence-specific DNA binding |
| Traes_2BL_E11AA2D03    | Traes_7DL_FE4B62461              | 0.87 | Major facilitator superfamily protein: transporter activity                                         |
| ( <i>TaFRO4-2BL</i> )  | Traes_2AL_C779F3245              | 0.86 | Ferric reduction oxidase 2                                                                          |
|                        | Traes_5BL_D20CD7D08              | 0.84 | Double Clp-N motif-containing P-loop nucleoside triph                                               |
|                        | Traes_2AL_1FA49CAC2              | 0.84 | Ferric reduction oxidase 4 (TaFRO4AL)                                                               |
|                        | Traes_6DL_88DFCF552              | 0.84 | C2H2-type zinc finger family protein: nucleic acid binding                                          |

PCC: Pearson correlation coefficient

**Table S6. The primers used for qRT-PCR, gene clone, and vector construction in this study.**

| Gene Name                                                              | Primer Sequences                                                            | Introduction (bp) |
|------------------------------------------------------------------------|-----------------------------------------------------------------------------|-------------------|
| <b>qRT-PCR for analysis of tissue and development expression level</b> |                                                                             |                   |
| TaNOX2(1DL)                                                            | Forward:5' AAGAGCCCGATCCGAAAAAT 3'<br>Reverse:5' GTGTTGCGGCATACAGGTAGG 3'   | 242               |
| TaNOX3(1DL)                                                            | Forward:5'GCCTTCTTCAAGGTTTGCAGC3'<br>Reverse:5'GCCACGTACTTTAGTCGACCTC3'     | 116               |
| TaNOX5(3BL)                                                            | Forward:5'TGTTGCGAGGCACAAGTTACTTC3'<br>Reverse:5'CTGCCTATCTCAGAACCCTGTA3'   | 271               |
| TaNOX7(3AS)                                                            | Forward:5' ATATTCATGCGAGCGCATT3'<br>Reverse:5' AGAAGACTGTCCTAAGCCGAG 3'     | 275               |
| TaNOX8(4DL)                                                            | Forward:5'CAGGAGAAGTGAAGCGCATA3'<br>Reverse:5'GTTGAATACAGCTCGGTTACGGT3'     | 186               |
| TaNOX10(5BL)                                                           | Forward:5'AACTGGCGCAAAGTCTACAAGGA3'<br>Reverse:5'ATCGATGAAACTCTTGACCCAACT3' | 289               |
| TaNOX11(5AL)                                                           | Forward:5'ACTTCCTCTACCTCACACAAA3'<br>Reverse:5'CGCAGTTGACGAAGATGTAC3'       | 222               |
| TaNOX12(5BL)                                                           | Forward:5'ACCATAATGAGTGCATGAAGCCT3'<br>Reverse:5'GGTCCGAAACCAACCCTATCTC3'   | 179               |
| TaNOX13(5AL)                                                           | Forward:5'GAGGAGAAGTGAAGCGCATAT3'<br>Reverse:5'GAATTCAGGGTCTCGGCG3'         | 159               |
| TaNOX15(6AS)                                                           | Forward:5'TGCCAGCAGAGCTTCATTTGG3'<br>Reverse:5'GGTCTCCATTGATAGGTCCATCA3'    | 227               |
| TaACTIN (AB181991.1)                                                   | Forward:5'GAAGTGCTTTTGAAGAGTCCGTT3'<br>Reverse:5'TTATTTTCATACAGCAGGCAAGC3'  | 207               |
| TaGAPDH (A0A1D6ATH8)                                                   | Forward:5'TTAGACTTGCAGCCAGCA3'<br>Reverse:5'AAATGCCCTTGAGGTTTCCC3'          | 81                |
| <b>QRT-PCR for expression level analysis of coexpression gene</b>      |                                                                             |                   |
| TaNOX2(1DL)                                                            | Forward:5' AAGAGCCCGATCCGAAAAAT 3'<br>Reverse:5' GTGTTGCGGCATACAGGTAGG 3'   | 242               |
| TaNOX3(1DL)                                                            | Forward:5'AGCAAGAATCCCTGGAGTGGT3'<br>Reverse:5'CTCCGACAGTTTTCTTTGATTT3'     | 273               |
| TaNOX7(3AS)                                                            | Forward:5' ATATTCATGCGAGCGCATT3'<br>Reverse:5' AGAAGACTGTCCTAAGCCGAG 3'     | 275               |
| TaNOX8(4DL)                                                            | Forward:5'CAGGAGAAGTGAAGCGCATA3'<br>Reverse:5'GTTGAATACAGCTCGGTTACGGT3'     | 105               |
| TaNOX12(5BL)                                                           | Forward:5'ACCATAATGAGTGCATGAAGCCT3'<br>Reverse:5'GGTCCGAAACCAACCCTATCTC3'   | 179               |
| Traes_1BL_39BCEB359                                                    | Forward:5'GATAAGATGACGGTTGCTCGC3'<br>Reverse:5'CACCAGTGAAAACCTTCGGCA3'      | 82                |
| Traes_3AS_8355038D4                                                    | Forward:5'GGTTCTTGCCCTTCGGCTATGT3'<br>Reverse:5'TCACGGGTGCAGAAGTATGAATAT3'  | 114               |
| Traes_4AS_174B77945                                                    | Forward:5'TGGTTACTACCGTTCAGCAAAAAG3'<br>Reverse:5'CGCTTTCACCAAGGCTACCA3'    | 214               |

|                     |                                                                               |     |
|---------------------|-------------------------------------------------------------------------------|-----|
| Traes_1AL_881A0ECDC | Forward:5'TGCCACCTACCCAGAGATTGA3'<br>Reverse:5'ACTCCTAGCTGCTTCCGTTTTTC3'      | 245 |
| Traes_2AS_CE5E5F0A1 | Forward:5'TTTAGTTCAGTTGGGTGTTTCGTTTC3'<br>Reverse:5'TGCCTGCCAAATAAATCAGTGTA3' | 212 |
| Traes_3AL_C777CC194 | Forward:5'GGACTACAACGCCGACGAAG3'<br>Reverse:5'GAGGCATCACACGGGACCACT3'         | 165 |
| Traes_5BL_194BD8F31 | Forward:5'TTCCTCCTCTCGCTCCACG3'                                               | 220 |

**Table S6.**  
**Continued**

| Gene Name                                                                   | Primer Sequences                                                                                               | Introduction (bp) |
|-----------------------------------------------------------------------------|----------------------------------------------------------------------------------------------------------------|-------------------|
| Traes_6AL_3712E0E1C                                                         | Reverse:5'GGGTCACCAGCCATGAGTATCT3'<br>Forward:5'TCCAGCAAGGAAGCAGTAGGTA3'<br>Reverse:5'AGGTTGAAGAATGCGAGGTAGA3' | 89                |
| Traes_2BS_A90182710                                                         | Forward:5'AGGTGGTAGTTCCCCGCAAG3'<br>Reverse:5'GCCTTTGCGTCTTTGTTTCTATT3'                                        | 211               |
| Traes_5DL_D4AC8C679                                                         | Forward:5'AGATTCGCAAACTGTCTTACGC3'<br>Reverse:5'TCAAGCGTGAAGCACCAAAA3'                                         | 129               |
| Traes_5BL_5732BA252                                                         | Forward:5'AATAATGACGCGGATATGTTTCG3'<br>Reverse:5'CATCTGCCTGGCCCTAATTC3'                                        | 180               |
| Traes_7BS_C25A31FF8                                                         | Forward:5'ACTTCGTGGCGAGAATGGTG3'<br>Reverse:5'TTTTGCGTGGGAAATGGTTAG3'                                          | 154               |
| Traes_2BS_40E324D13                                                         | Forward:5'CGTCGCCACCTTCTGTCTAA3'<br>Reverse:5'ATCATTCGGGCTTGAGGACTC3'                                          | 151               |
| Traes_6AL_AE01DC0EA                                                         | Forward:5'AAAGTGTGGAGTTCTCCGGTTG3'<br>Reverse:5'TCTTCTTGCCAGAGCCTTCG3'                                         | 165               |
| <b>Promoter clone of <i>TaNOXS</i></b>                                      |                                                                                                                |                   |
| <i>TaNOX2-1AL</i>                                                           | Forward:5'TCCCGCACAAATGGACAGCA3'<br>Reverse:5'ACCCCCGCATCTTCCCTT3'                                             | 2285              |
| <i>TaNOX3-DL</i>                                                            | Forward:5'GGGCATTTATTTCAACCAGCAC3'<br>Reverse:5'AGCAGAACCGAAGAAGCAGTAGT3'                                      | 1949              |
| <i>TaNOX7-3AS</i>                                                           | Forward:5'TACTTCATCCGTTGTTCCGCACAA3'<br>Reverse:5'CTTTATTTACCTCTCAGGGCAATT3'                                   | 2045              |
| <i>TaNOX8-4DL</i>                                                           | Forward:5'AACAACACGGACGGACGAAAG3'<br>Reverse:5'CCCTGTTTGAGCCTTCTAAGTTCC3'                                      | 2187              |
| <i>TaNOX10-5BL</i>                                                          | Forward:5'TACTCGGCTATGTAGGTTGGATGT3'<br>Reverse:5'GGCCGGCCGCGGCTCCAGCTAGA3'                                    | 1813              |
| <i>TaNOX12-5BL</i>                                                          | Forward:5'GTTTGTGGCTACGGTTGGATGC3'<br>Reverse:5'CTCGTTGTCGGAGGTGTCGG3'                                         | 2200              |
| <i>TaNOX13-5AL</i>                                                          | Forward:5'GCATCGGCATCACTGGCAGC3'<br>Reverse:5'CCAGCTTCAATGTCAGCCATGTCC3'                                       | 2298              |
| <b>Vector construction for PGL3-Promoters::<i>Rluc-35S</i>::<i>Fluc</i></b> |                                                                                                                |                   |
| <i>TaNOX2-1AL</i>                                                           | Forward:5'GGGGTACCTCCCGCACAAATGGACAGCAAGAG3'<br>Reverse:5'GGACTAGTCTTCCCTTGGGCAGAGCAGTCCGT3'                   | 2290              |
| <i>TaNOX3-1DL</i>                                                           | Forward:5'GGGGTACCGGCATTTATTTCAACCAGCACTGAAAC3'                                                                | 1977              |

|                    |                                                               |      |
|--------------------|---------------------------------------------------------------|------|
|                    | Reverse:5'TCCCCCGGGCGGGTAGTAGCAGAACCGAAGAAGCAGT3'             |      |
| <i>TaNOX7-3AS</i>  | Forward:5'CGGAATTCTACTTCATCCGTTGTTCCGCACAA3'                  | 2063 |
|                    | Reverse:5'AAAAGTGCAGCTTTATTTACCTCTCAGGGCAATT3'                |      |
| <i>TaNOX8-4DL</i>  | Forward:5'GGGGTACCAACAACACGGACGGACGAAAGGCC3'                  | 2109 |
|                    | Reverse:5'GGACTAGTCTCCTTCTTCTTTTACCTAACCC3'                   |      |
| <i>TaNOX10-5BL</i> | Forward:5'TACCGAGCTCGAATTCTACTCGGCTATGTAGGTTGGAT<br>GT3'      | 1852 |
|                    | Reverse:5'GTCATGGTGDNGCTAGCCTGCAGGGCCGCGCCGGCT<br>CCAGCTAGA3' |      |

**Table S6.**  
**Continued**

| Gene Name                                                | Primer Sequences                                                                                                         | Introduction (bp) |
|----------------------------------------------------------|--------------------------------------------------------------------------------------------------------------------------|-------------------|
| <i>TaNOX12-5BL</i>                                       | Forward:5'GGGGTACCGTTTGTGGCTACGGTTGGATGCC3'<br>Reverse:5'GGACTAGTGGCCGCTCCCCGCGCCCCGCC3'                                 | 2108              |
| <i>TaNOX13-5AL</i>                                       | Forward:5'CGGAATTCGCATCGGCATCACTGGCACGTTT3'<br>Reverse:5'AAAAGTGCAGGTCCTTCTTCTTTTACCTAAC3'                               | 2294              |
| <b>Gene clone for TaNOXS</b>                             |                                                                                                                          |                   |
| <i>TaNOX7-3AS</i>                                        | Forward:5'GGCCATGGCTGATATCGGATCC3'<br>Reverse:5'TGGTGGTGGTGGTGCCTCGAGTGC3'                                               | 2760              |
| <i>TaNOX10-5BL</i>                                       | Forward:5'TCTCATACCATCTCCTCCACCTACT3'<br>Reverse:5'TAACGGTCATCCTTCTTCTTCTTCTCTCT3'                                       | 3277              |
| <i>TaFRO4-2BL</i>                                        | Forward:5' GAGTGTCTGGAGTGACCAAATACG3'<br>Reverse:5' AGAAATGGTGATAGTCATAGAAACGA3'                                         | 2392              |
| <i>TaNOX-like4</i>                                       | Forward:5' TTTCGTGGACGGAGAAGATAGCA3'<br>Reverse: 5' GTACTCCCCGGGCTCGAC3'                                                 | 1585              |
| <b>Vector construction for PTF486-35S:: TaNOXS: eGFP</b> |                                                                                                                          |                   |
| <i>TaNOX7-3AS</i>                                        | Forward:5'CGACTCTAGAGGATCCATGGAGATGCCTGATATTGAAGCTGGC3'<br>Reverse:5'TGCTCACCATGGATCCGAAGTTCTCCTTGTGAAACTCAAATTG3'       | 2732              |
| <i>TaNOX10-5BL</i>                                       | Forward:5'GTCTACCATCAGCCCAGAGGATCCATGCATAACTACGGAGGCGG3'<br>Reverse:5'TGCTCACCATGGATCCGAAATTCTCCTTGTGGAACCTCGAAT3'       | 2786              |
| <i>TaFRO4-2BL</i>                                        | Forward:5'GTCTACCATCAGCCCAGAGGATCCATGGACAATCGTACTCTTGGCAAAG3'<br>Reverse:5'TGCTCACCATGGATCCCCAGGTGAAGCTTATAGACTGGAAATG3' | 2209              |
| <i>TaNOX-like4</i>                                       | Forward:5'GTCTACCATCAGCCCAGAGGATCCATGTGGACGCCGTCGCGAGG3'<br>Reverse:5'TGCTCACCATGGATCCCCGGTACTCCCCGGGCTCGACGC3'          | 1558              |

## 2. Supplementary information S1 for experimental program

### Sequence retrieval and identification of the NOX gene family in wheat

We retrieved the potential sequences of NOX family members including TaNOXs and TaFROs in wheat from IWGSC (<http://www.wheatgenome.org/>, last accessed May 25, 2017), NCBI (<https://www.ncbi.nlm.nih.gov/>, last accessed May 25, 2017), and e! Ensembl Plants (<http://plants.ensembl.org/index.html>, last accessed May 25, 2017), with *Arabidopsis* and rice NOX sequences as queries. Then we identified each NOX member by predicting the conserved domains in EMBL-EBI (<http://pfam.xfam.org/search#tabview=tab1>) and SMART (<http://smart.embl-heidelberg.de/>) websites. For further information, we analyzed the physicochemical parameters such as the molecular



weight (MW) and isoelectric point (pI) of the wheat NOX and FRO candidates with the ExpASY Compute pI/Mw Program ([http://web.expasy.org/compute\\_pi/](http://web.expasy.org/compute_pi/)), predicted the subcellular localization with Plant-mPLOC (<http://www.csbio.sjtu.edu.cn/bioinf/plant-multi/>) and the numbers of transmembrane helix with TMHMM v2.0 (<http://www.cbs.dtu.dk/services/TMHMM/>), and performed amino acid sequence alignment by the software of BioEdit v7.0.5 and DNAMAN 6.0.

### Sequence alignment and gene structure analysis

The un-rooted maximum-likelihood phylogenetic tree of wheat NOX and FRO family members was constructed by alignment the complete protein sequences with MEGA 6.06, in which the bootstrap was set to 1,000 replicates. The logos of domain organization were generated by submitting the full-length amino acid sequences to EMBL-EBI or SMART websites, and were amended with Adobe Photoshop CS6. The four conserved domain motifs, namely NADPH\_Ox, Ferric\_reduct, FAD\_binding\_8 and NAD\_binding\_6 in each NOX sequence, were generated by submitting the full-length amino acid sequences to MEME Suite (<http://meme-suite.org/>). These domains were used to perform multiple alignment analysis. The bits score means information content of each position in the amino acid sequence.

### Phylogenetic relationships of NOX and FRO gene families in wheat and seven other plant species

Multiple sequence alignments and phylogenetic relationship analysis of NOX and FRO gene families were performed using the maximum-likelihood method with MEGA 6.06 based on the full-length protein sequences from eight plant species. Due to the fact that, the wheat NOX homologues assigned as the same number in gene denomination are similarity in gene structure and protein sizes each other, we selected the biggest ones (including 23 homologues) from those as the representations for phylogenetic analysis. All the amino acid sequences used here, including 23 from *Triticum aestivum*, 11 from *Triticum urartu*, 11 from *Brachypodium distachyon*, 9 from *Hordeum vulgare*, 13 from *Aegilops tauschii*, 16 from *Zea mays*, 11 from *Oryza sativa*, and 18 from *Arabidopsis thaliana*, were gotten from the e! Ensembl Plants website (<http://plants.ensembl.org/index.html>), the Arabidopsis Information Resource website (<http://www.arabidopsis.org/>), the Rice Genome Annotation Project website (<http://rice.plantbiology.msu.edu/index.shtml>), the URGI website (<https://wheat-urgi.versailles.inra.fr/Seq-Repository>) and the NCBI website (<https://www.ncbi.nlm.nih.gov/>), etc. To further analyze the phylogenetic relationships of NOX family genes, non-synonymous (Ka) and synonymous (Ks) in paralogous and/or orthologous gene pairs from four species, namely *Triticum aestivum*, *Aegilops tauschii*, *Triticum urartu* and *Hordeum vulgare*, were estimated using the bioinformatics software PAMLX 1.2 based on the aligned CDS sequences of each paralogous gene pairs with the terminator codons removed. Divergence time (T, million years ago, Mya) for each orthologous or paralogous gene pairs were estimated using the average Ks of  $\lambda$  substitutions per synonymous sites per year.

### Subcellular localization analysis

Analysis of the subcellular location of wheat NOXs were performed in rice protoplasts using transient transformation systems with some modifications (Zhang et al., 2011). The full-length open reading frame (ORF) of *TaNOX7*, *TaNOX10*, *TaFRO4* and *TaNOX-like4* genes were used for the construction of vectors. The merged sequences of *TaNOX7::eGFP*, *TaNOX10::eGFP*, *TaFRO::eGFP* and *TaNOX-like4::eGFP* were under the control of the constitutive 2×35S promoter (cauliflower mosaic virus: CaMV) in pTF486 vector, which were transformed into rice protoplasts. After 16 h incubation with gentle shaking (45 rpm) at 23°C in darkness, the transformed protoplasts were observed with a confocal microscope (A1R, Nikon, Tokyo, Japan). At least three monoclonal were sent for sequencing upon gene cloning and vector construction for each examined gene.

### Prediction and functional analysis of cis-regulatory elements

The 2,000 bp promoter sequences of TaNOXs (named as TaNOX-pros) selected from the genomic DNA sequences upstream of the transcriptional start sites were used to analyze the cis-acting elements. The cis-acting elements existing in the promoters were predicted by the databases: PlantCARE (<http://bioinformatics.psb.ugent.be/webtools/plantcare/html/>) (Lescot et al., 2002), PLACE (<http://www.dna.affrc.go.jp/PLACE/>). Each cis-element logo and position were drawn manually according to the sketch inferred from the Gene Structure Display Server (<http://gsds.cbi.pku.edu.cn>) by aligning the cis-elements-out DNA sequence and the corresponding full-length DNA sequence of TaNOX-pros with “ATG” and “TAA” added at 5’ and 3’ ends, respectively. The prediction score of every cis-element is greater than or equal to 5. In general, the selected cis-elements were first drawn on the sense strands instead of the antisense strands unless there were not the cis-elements on the sense strands but on the antisense strands.

Then, seven promoter sequences were cloned by PCR using the gene-specific primers, with the isolated genomic DNA from wheat leaves as the template. The promoter sequences was then cloned into the corresponding site of the dual luciferase reporter expression vector (Basic vector) instead of the 2×35S promoter in front of the Rluc gene. The Basic vector contains both expression cassettes of firefly luciferase (Fluc) and Renilla luciferase (Rluc), and the more information about it could refer to Fig. 7A and a previous study (Gu et al., 2013). Three or more monoclonal lines were sent for sequencing to identify each promoter sequence and related vector construction (GenScript Co., Ltd, Nanjing, China). The primers used for cloning the promoters and constructing the dual luciferase reporter expression vectors were listed in Supplementary Table S6.

The preparation of rice protoplasts and the PEG-mediated transformation were performed as described previously (Zhang et al., 2011). Following transformation, the protoplasts were resuspended in 1 mL cell culture solution I per well and plated in 12-well plates (Nest Biotech Co., Ltd, Jiangsu, China) for incubation at 45 rpm at 23°C for 16 h in the dark. In order to determine the responses of the TaNOX-pros to temperature stresses and hormone treatments, the transformed protoplasts were incubated at 23°C for 2 h and then were placed at 42°C or 4°C or treated with exogenous abscisic acid (ABA) or methyl jasmonic acid (MeJA) for 14 h, respectively, while the control groups were still placed at 23°C for 14 h until harvested for luciferase activity detection.

Luciferase activity detection was performed with the Dual-Luciferase® Reporter Assay System (DLTAS) ([www.promega.com](http://www.promega.com)) with some modification (Gu et al., 2013). The cultures from one well were put into a 1.5 ml of Eppendorf tube and then harvested by centrifugation at 12,000 rpm for 5 min. After being re-suspended in 30 µl potassium phosphate lysis buffer (PLB, provided by DLTAS kit), the protoplasts were freeze-thawed twice at -80°C and then centrifuged at 12,000 rpm at 4°C for 10 min. The resulted supernatants were then collected for luciferase activity detection. LSD’s t-tests were performed using SPSS 16.0 software. Statistical differences between means (Rluc activity normalized against Fluc activity) from the test and control groups were considered significant at  $P \leq 0.05$  based on one-way ANOVA. All values were shown as the average of the data collected from three independent experiments, each having three replicates.

### Plant materials, treatments, expression profiles and coexpression network analysis

The expression patterns of wheat NOX family genes at different developmental stages and in different tissues were carried out with the online Genevestigator v3 (<https://genevestigator.com/gv/>). Results were

given as heat maps by submitting the probe ID of the genes into the Ta\_mRNASeq\_WHEAT\_GL-0 database in Genevestigator v3. The inducible expression patterns of the genes were obtained in the same way, while the data from both the Ta\_mRNASeq\_WHEAT\_GL-0 database and the TA\_AFFY\_WHEAT-0 database in Genevestigator v3.

To construct the coexpression patterns of wheat NOX genes with the others, the gene expression data from ten different developmental stages and/or twenty two different tissues of wheat plants were considered and the probe IDs of eight NOX genes including TaNOX2-1DL, TaNOX3-1DL, TaNOX7-3AS, TaNOX8-4DL, TaNOX12-5BL, TaNOX13-5AL, TaFRO3-2BL and TaFRO4-2BL were submitted into the Ta\_mRNASeq\_WHEAT\_GL-0 database to search for the potential coexpression genes using the Similarity Search-Co-Expression tool in Genevestigator v3. The coexpression patterns were then constructed and presented as heat maps and also table lists.

For the analysis of the tissue-specific expression profiles of wheat NOX genes, seven tissues of wheat (*Triticum aestivum* cv. Chinese Spring) including young leaf, young root, leaf, stem, leaf sheath, young panicle and panicle were harvested to isolate the total RNA for further qRT-PCR. For analysis of the inducible expression profiles of the NOX genes, the 14 d old hydroponic seedlings that were treated with 4°C, 40°C, 200 mM NaCl, 20% PEG6000, 30 µM MV, 100 µM MeJA and 100 µM ABA respectively, for 0, 12 and 24 h, were used as the materials for RNA extraction. For the analysis of the coexpression levels of *TaNOXs* and other genes in wheat, the 7 d old seedlings treated with 42°C for 24 h, 200 mM NaCl or 10 µM MeJA or 10 µM ABA for 6 h, soil drought for 2 d, and nature drying for 30 min respectively, were used as the materials for RNA extraction. Total RNA was extracted from the different samples using RNAiso TM Plus (Takara, Dalian, China) and treated with RNase-free DNase I (Takara, Dalian, China). The concentration and quality of the RNAs were tested by the NanoDrop 1000 Spectrophotometers (Thermo, USA) and the first-strand cDNA synthesized by using EasyScript First-Strand cDNA Synthesis SuperMix (TransGen Biotech, Beijing, China). The gene expression levels were detected with the UltraSYBR Mixture (Kangwei, Beijing, China) using a real-time PCR detection system CFX96 (Bio-Rad, Hercules, California, America) with *TaActin* (AB181991.1) and *TaGAPDH* (ABS59297.1) as the internal transcript level controls. All the expression level represent the mean  $\pm$  SD of data collected three independent experiments, each having three or four replicates. The detailed primer sequences are shown in Supplementary Table S6.

## Reference

1. Zhang, Y., Su, J., Duan, S., Ao, Y., Dai, J., Liu, J. et al. (2011). A highly efficient rice green tissue protoplast system for transient gene expression and studying light/chloroplast-related processes. *Plant methods*, 7, 30. doi: 10.1186/1746-4811-7-30
2. Lescot, M., Dehais, P., Thijs, G., Marchal, K., Moreau, Y., Van de Peer, Y. et al. (2002). PlantCARE, a database of plant cis-acting regulatory elements and a portal to tools for in silico analysis of promoter sequences. *Nucleic acids research*, 30, 325-327.
3. Gu, L., Han, Z., Zhang, L., Downie, B. and Zhao, T. (2013). Functional analysis of the 5' regulatory region of the maize GALACTINOL SYNTHASE2 gene. *Plant science: an international journal of experimental plant biology*, 213, 38-45. doi: 10.1016/j.plantsci.2013.09.002
